1 **TITLE** (< 120 characters)

2 **Nucleus-accumbens dopamine tracks aversive-stimulus duration and prediction but not value**  
3 **or prediction error**

4 **AUTHORS**

5 J.N. Goedhoop<sup>1,2</sup>, B.J.G. van den Boom<sup>1,2</sup>, L. Fellinger<sup>1,2</sup>, T. Arbab<sup>1,2</sup> & I. Willuhn<sup>1,2</sup>

6 *Affiliations:*

7 1: Netherlands Institute for Neuroscience, Royal Netherlands Academy of Arts and Sciences,  
8 Amsterdam, Netherlands.

9 2: Department of Psychiatry, Amsterdam UMC, University of Amsterdam, Amsterdam, Netherlands.

10 **ABSTRACT** (< 150 words)

11 There is active debate on the role of dopamine in processing aversive stimuli, where inferred roles  
12 range from no involvement at all, to signaling an aversive-prediction error (APE). Here, we  
13 systematically investigate dopamine release in the nucleus-accumbens core (NAC), which is closely  
14 linked to reward-prediction errors, in rats exposed to white noise (WN, a versatile, underutilized,  
15 aversive stimulus) and its predictive cues. Both induced a negative dopamine ramp, followed by slow  
16 signal recovery upon stimulus cessation. In contrast to reward conditioning, this dopamine signal was  
17 unaffected by WN value, context valence, or probabilistic contingencies, and the WN dopamine-  
18 response shifted only partially towards its predictive cue. However, unpredicted WN provoked slower  
19 post-stimulus signal recovery than predicted WN. Despite differing signal qualities, dopamine  
20 responses to simultaneous presentation of rewarding and aversive stimuli were additive. Together,  
21 our findings demonstrate that instead of an APE, NAC dopamine primarily tracks prediction and  
22 duration of aversive events.

23

24 **INTRODUCTION**

25 The midbrain dopamine system plays critical roles in motivation, learning, and movement; specifically  
26 for learning about rewards and creating motivational states that promote reward-seeking (Berridge &  
27 Robinson, 1998; Bromberg-Martin *et al.*, 2010; Berke 2018; Schultz, 2019). One of the most  
28 prominent functions of dopamine is the encoding of a so-called reward prediction error (RPE) signal  
29 (Schultz *et al.*, 1997): When a reward is fully predicted by a cue, the increase in dopamine cell firing  
30 and terminal release of dopamine shifts backwards in time from the moment of reward delivery, to that  
31 of the cue presentation (Schultz *et al.*, 1997; Flagel *et al.*, 2011). Furthermore, dopamine neurons  
32 pause their firing when a predicted reward is omitted, and increase their firing in response to the

33 delivery of an unpredicted reward. Thus, dopamine neurons encode the difference between predicted  
34 and obtained reward, which is corroborated by the fact that dopamine-neuron activity scales with the  
35 relative value of reward and unexpected deviations from this value (Bromberg-Martin & Hikosaka,  
36 2009).

37 Although the vast majority of studies focus on the relationship between dopamine and stimuli  
38 with a positive valence (rewards), the relevance of the dopamine system in processing stimuli with the  
39 opposite valence (aversive) has also generated great interest. In contrast to the primarily stimulatory  
40 response of rewards on dopamine activity, the reports on the effect of aversive events on the  
41 dopamine system are less consistent. For example, on the level of dopamine-neuron cell-bodies,  
42 aversive stimuli were demonstrated to result in inhibition of neuronal activity (Ungless *et al.*, 2004;  
43 Mileykocskiy & Morales, 2011), excitation thereof (Anstrom *et al.*, 2009; Valenti *et al.*, 2011), or no  
44 effect at all (Mirenowicz & Schultz, 1996; Fiorillo, 2013). The widely-accepted explanation for these  
45 varying results is that sub-populations of dopamine neurons exhibit different response profiles to  
46 aversive stimuli (Schultz & Romo, 1987; Guarraci & Kapp, 1999; Coizet *et al.*, 2006; Bromberg-Martin  
47 & Hikosaka, 2009; Zweifel *et al.*, 2011; Cohen *et al.*, 2012; Lammel *et al.*, 2011), whereby variance is  
48 presumably introduced by different types of aversive stimuli, by the fact that some studies were  
49 performed in awake and others in anesthetized animals, and by the location and projection targets of  
50 the recorded dopamine neurons (Brischoux *et al.*, 2009; Matsumoto & Hikosaka, 2009; Lammel *et al.*,  
51 2011). However, activity at the level of dopamine-neuron cell-bodies does not necessarily always  
52 translate to their projection-targets (Mohebi *et al.*, 2019), as axonal-terminal release of dopamine can  
53 operate independently from cell-body activity (Threlfell *et al.*, 2012). Therefore, in interrogating the  
54 entire spectrum of functions of the dopamine system, it is imperative to include projection-target  
55 measurements of extracellular dopamine concentrations.

56 Midbrain dopamine neurons modulate their targets via population signals: Dopamine release  
57 from a large number of extra-synaptic terminals, combined, constitutes a diffusion-based signal that is  
58 perpetuated by volume transmission (Rice & Cragg, 2008). The vast majority of projections from  
59 dopaminergic neurons target the striatum and its subregions. Inconsistent with the classic hypothesis  
60 positing that the dopamine system broadcasts a uniform signal across the striatum, it has been  
61 reported multiple times in recent years, that dopamine signals display regional heterogeneity (Willuhn  
62 *et al.*, 2012, Willuhn *et al.*, 2014a, Lammel *et al.*, 2011, DeJong *et al.*, 2019, Menegas *et al.* 2017;  
63 Klanker *et al.* 2019). This heterogeneity is reflected in dopamine responses to aversive events  
64 throughout the striatum: Whereas microdialysis studies report an increase in dopamine release in the  
65 nucleus accumbens in response to aversive events (Young *et al.*, 1993; Young, 2004; Wilkinson *et al.*,  
66 1998; Bassareo *et al.*, 2002; Pascucci *et al.*, 2007; Ventura *et al.*, 2007; Martinez *et al.*, 2008 but see  
67 Mark *et al.*, 1999; Liu *et al.* 2008), studies employing techniques with a higher, subsecond temporal  
68 resolution (e.g., fast-scan cyclic voltammetry (FSCV) or fluorescence fiber photometry) arrive at less  
69 consistent conclusions. For example, aversive stimuli produced an increase in dopaminergic activity in  
70 the nucleus accumbens shell (NAS) in some studies (Badrinarayan *et al.*, 2012; DeJong *et al.*, 2019),  
71 but a decrease in others (Roitman *et al.*, 2008; Wheeler *et al.*, 2011; McCutcheon *et al.*, 2012;

72 Twining *et al.*, 2015). Similarly, contradictory findings are also reported in the neighboring nucleus  
73 accumbens core (NAC), where studies find both increased (Budygin *et al.*, 2012; Mikhailova *et al.*,  
74 2019) and decreased dopamine activity (Badrinarayan *et al.*, 2012; Oleson *et al.*, 2012; DeJong *et al.*,  
75 2019; Stelly *et al.*, 2019). In contrast, in the tail of the striatum, aversive events exclusively result in  
76 increased dopaminergic activity (Menegas *et al.*, 2017; Menegas *et al.*, 2018). Overall, it can be  
77 concluded that most studies observe a change in dopaminergic activity in response to aversive  
78 stimuli, that there are substantial differences between striatal regions in this response, and that it  
79 remains unclear what determines whether aversive events provoke an increase or a decrease in  
80 dopaminergic activity within striatal regions.

81 Delineating the role of dopamine in processing aversive events crucially requires  
82 understanding what the above-described changes in dopamine signaling encode specifically; or in  
83 other words, whether these changes reflect aversive-prediction errors (APEs, in which the dopamine  
84 response would reflect the discrepancy between expected and received aversive events) or merely  
85 individual aspects of aversive conditioning (such as the presence of aversive stimuli, and/or their  
86 prediction). A thorough analysis by Fiorillo (2013) concluded that dopaminergic midbrain neurons do  
87 not encode aversive stimuli, but other studies have observed aspects of a dopamine APE, such as the  
88 predictive cue adopting the dopamine response of an aversive stimulus (Guaracci & Kapp, 1998;  
89 Oleson *et al.*, 2012; Badrinarayan *et al.*, 2012), or an APE-like response when the aversive stimulus  
90 was unpredicted or omitted (Matsumoto & Hikosaka, 2009; Matsumoto *et al.* 2016; Menegas *et al.*  
91 2017; Salinas-Hernández *et al.*, 2018; DeJong *et al.*, 2019). However, it should be kept in mind that in  
92 case of omission or early termination of an expected aversive event, rewarding aspects of a milder-  
93 than-expected aversive event (RPE) may be mixed with an APE (Oleson *et al.*, 2012; Salinas-  
94 Hernández *et al.*, 2018; Stelly *et al.*, 2019).

95 To consolidate these contradictory findings, we systematically evaluated whether dopamine  
96 truly signals an APE through a series of behavioral experiments in rats, in which we varied the value  
97 of the aversive stimulus, context valence, and probabilistic contingencies, and compared aversive and  
98 appetitive conditioning. Using FSCV, we measured the real-time dopamine response to these  
99 conditions in the NAC, since this striatal region is a hot spot for RPE-like signals (Flagel *et al.*, 2011;  
100 Papageorgiou *et al.*, 2016) and is also tightly linked to motivational processes related to aversion  
101 avoidance (Badrinarayan *et al.*, 2012; Oleson *et al.*, 2012; Stelly *et al.*, 2019). We employed loud  
102 white noise (WN) as the aversive stimulus. WN provides several advantages over more commonly-  
103 used aversive stimuli (such as electric shocks or air puffs), as it is well-tolerated by rats and not  
104 painful, precisely-controllable (intensity and duration can be effortlessly titrated), aversive without  
105 inducing freezing (most pertinent to the current study, as this might interfere with the dopamine  
106 signal), does not jeopardize the recording equipment, does not introduce artefacts to the recordings,  
107 and can be administered reliably (see Discussion). Based on the above-described findings, we  
108 hypothesized that NAC dopamine would exhibit an APE. However, we find that NAC dopamine  
109 concentration ramps down in response to both WN exposures and its predicting cue, ramps back

110 upwards upon stimulus cessation, that these ramps were qualitatively different from appetitive  
111 conditioning, and were inconsistent with a full APE signal.

112

## 113 **RESULTS**

### 114 **White noise (WN) is aversive**

115 We established the aversiveness of loud WN using a real-time place-preference test, in which rats  
116 were exposed to 90-dB WN upon entry into one of the four quadrants of an open field (Figure 1A). An  
117 example path traversed by a rat over the course of 30 minutes is depicted in Figure 1A (left panel),  
118 where the dark shaded area represents the quadrant paired with WN. On average, rats ( $n = 10$ ) spent  
119 a significantly smaller percentage of time in the WN quadrant ( $9.71 \pm 1.65$ ) compared to chance level  
120 ( $t(9) = 9.585$ ,  $p < 0.0001$ ; Figure 1A, right panel). Next, we validated that rats can discern between  
121 different magnitudes of WN in an operant choice task. Here, rats could choose between pressing one  
122 of two extended levers, both of which prompted immediate delivery of a food pellet, but one of which  
123 additionally presented 5s of 70, 90, or 96 dB WN. Unsurprisingly, rats ( $n = 6$ ) preferred the non-WN  
124 lever, as indicated by a significant main effect of WN intensity using a Friedman test ( $\chi^2(3) = 11.57$ ,  $p$   
125  $= 0.0003$ ). Importantly, when comparing the WN-paired lever presses, rats significantly preferred the  
126 70-dB WN to the 96-dB WN (post-hoc Dunn's tests,  $p = 0.0027$ ; Figure 1B). Interestingly, exposure to  
127 WN stimulated locomotor activity: Rats in an operant box significantly increased locomotion speed in  
128 response to semi-random presentation of 6s-WN bouts ( $t(13) = 7.059$ ,  $p < 0.0001$ ; Figure 1C).

### 129 **WN suppresses dopamine release in the nucleus accumbens core (NAC)**

130 All FSCV recordings (and all behavioral data presented from here on out) were conducted in operant  
131 boxes equipped with a food magazine, a multiple-tone generator (cue speaker), and WN generators  
132 (WN speaker) (Med-Associates; Figure 1D). Electrolytic lesions at the FSCV electrode tip were used  
133 to histologically verify electrode placement (Figure 1E). Histological analysis confirmed for all animals  
134 included in this study that the sensing end of their FSCV electrodes was consistently placed in the  
135 NAC (Figure 1F). Unexpected exposure to 6s of 90-dB WN strongly and reliably decreased  
136 extracellular concentrations of dopamine in the NAC (Figure 1G).

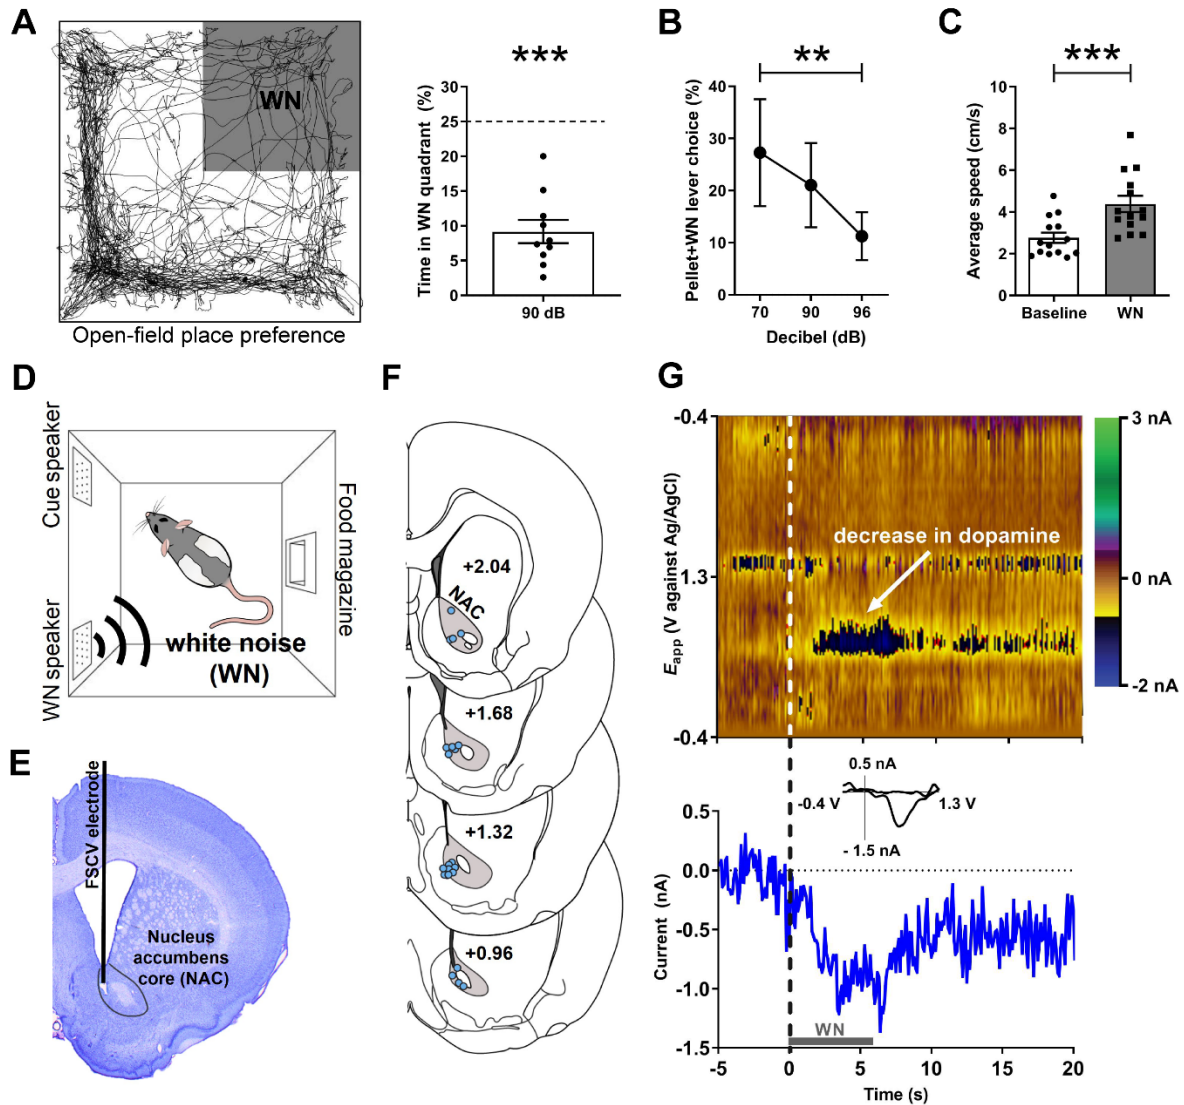

137 **Figure 1 - White noise (WN) is an aversive stimulus that lowers dopamine concentration in the**  
 138 **NAC.** (A) Left: Example trajectory of a rat in the real-time place preference test (30 min), in which  
 139 entry into the upper-right quadrant (shaded) led to 90-dB WN exposure. Right: Aversiveness of WN in  
 140 the place preference test quantified as significantly decreased time spent in the WN quadrant ( $n = 10$ ,  
 141  $9.71 \pm 1.65$ ,  $t(9) = 9.585$ ,  $p < 0.0001$ ). (B) Rats ( $n = 6$ ) discern between different WN magnitudes in  
 142 an operant choice task, where they had to choose between pressing a lever that resulted in a food-  
 143 pellet delivery and a lever that resulted in a food-pellet delivery plus simultaneous 5s of WN  
 144 (Pellet+WN; Friedman test,  $\chi^2(3) = 11.57$ ,  $p = 0.0003$ ). 70 dB was less aversive than 96 dB ( $p =$   
 145  $0.0027$ ). Data are mean $\pm$ SEM. (C) Semi-random presentations of 6s-WN bouts increased the  
 146 locomotion speed of rats in an operant box during the WN epoch compared to pre-WN baseline (post-  
 147 hoc Dunn's test,  $t(13) = 7.059$ ,  $p < 0.0001$ ). (D) All fast-scan cyclic voltammetry (FSCV) recordings  
 148 took place in operant boxes equipped with a food magazine, a multiple-tone generator (cue speaker),  
 149 and a WN generator (WN speaker). (E) Example cresyl violet-stained brain slice depicting an  
 150 electrolytic lesion in the NAC (outlined) at the tip of the FSCV electrode (vertical black line). (F)  
 151 Schematic overview of FSCV recording locations (blue dots) in the NAC (gray) of all animals. (G)  
 152 Single-trial pseudocolor plot (top panel), dopamine trace (bottom panel), and cyclic voltammograms  
 153 (inset in bottom panel) for representative, dopamine-specific current fluctuations recorded in NAC, 5s  
 154 before WN (dashed line), during 6s of WN (gray bar), and 14s after WN.



155 **Different temporal NAC dopamine dynamics during aversive and appetitive Pavlovian**  
156 **conditioning**

157 Dopamine release in the NAC is often consistent with a temporal-difference RPE, where an increase  
158 in dopamine activity, initially time-locked to the delivery of a reward, shifts backwards in time to its  
159 predicting cue. It is assumed that this phenomenon reflects the learned association between  
160 predictive cue and reward, where the reward becomes fully predicted by the cue and, therefore, no  
161 prediction error occurs at the time of reward delivery after sufficiently repeated cue-reward pairings  
162 (e.g., Schultz *et al.*, 1997; Flagel *et al.*, 2011). Our first experiment investigated whether a similar  
163 phenomenon also applies to aversive stimuli and their predictors, and in what time frame such a shift  
164 may occur. Rats ( $n = 16$ ) were exposed to 30 pairings of cue (5s) and 90-dB WN (6s) that were  
165 separated by a variable inter-trial-interval (Figure 2A). In order to visualize the rapid changes in  
166 dopamine response presumably reflecting learning, the first five trials are depicted individually, and  
167 based on their stable visual appearance, trials 6-10 and 11-30 were binned together. Using one-way  
168 repeated measures ANOVAs, in which we compared the average dopamine concentration during  
169 baseline, cue, and WN epochs, we found significant main effects in all trials (Trial 1:  $F(1.403, 19.65) =$   
170  $6.853$ ,  $p = 0.0102$ ; Trial 2 :  $F(1.324, 19.86) = 8.205$ ,  $p = 0.0059$ ; Trial 3:  $F(1.265, 18.98) = 6.737$ ,  $p =$   
171  $0.013$ ; Trial 4:  $F(1.100, 16.50) = 5.016$ ,  $p = 0.0363$ ; Trial 5:  $F(1.548, 23.23) = 21.90$ ,  $p < 0.0001$ ; Trials  
172 6-10:  $F(1.025, 15.38) = 15.94$ ,  $p = 0.0011$ ; Trials 11-30:  $F(1.093, 16.39) = 38.42$ ,  $p < 0.0001$ ). Post-  
173 hoc analyses using Wilcoxon signed-rank tests with a Holm-Bonferroni multiple-comparison correction  
174 revealed significantly lower dopamine concentrations during the WN epoch compared to pre-cue  
175 baseline during trial 1 ( $Z = -1.988$ ,  $p = 0.0235$ ), trial 2 ( $Z = -2.430$ ,  $p = 0.0075$ ), trial 3 ( $Z = -2.327$ ,  $p =$   
176  $0.010$ ), trial 5 ( $Z = -3.464$ ,  $p < 0.0005$ ), trials 6-10 ( $Z = 3.103$ ,  $p = 0.001$ ) and trials 11-30 ( $Z = -3.516$ ,  $p$   
177  $< 0.0001$ ), indicating that the decrease in dopamine during WN is an unconditioned response, since it  
178 is observed already during the first trial. In contrast, we only observed significantly lower dopamine in  
179 the cue epoch compared to pre-cue baseline during trial 5 ( $Z = -1.965$ ,  $p = 0.0245$ ), trials 6-10 ( $Z = -$   
180  $2.999$ ,  $p = 0.0015$ ), and trials 11-30 ( $Z = -3.516$ ,  $p < 0.0001$ ), indicating that this decrease develops  
181 over time and, therefore, is a conditioned response. In these first 30 trials, the decrease in  
182 extracellular dopamine during the WN epoch did not disappear or decrease. Thus, WN does not  
183 provoke a substantial temporal shift of NAC dopamine signaling from unconditioned to conditioned  
184 (predictive) cue within the first session of training.

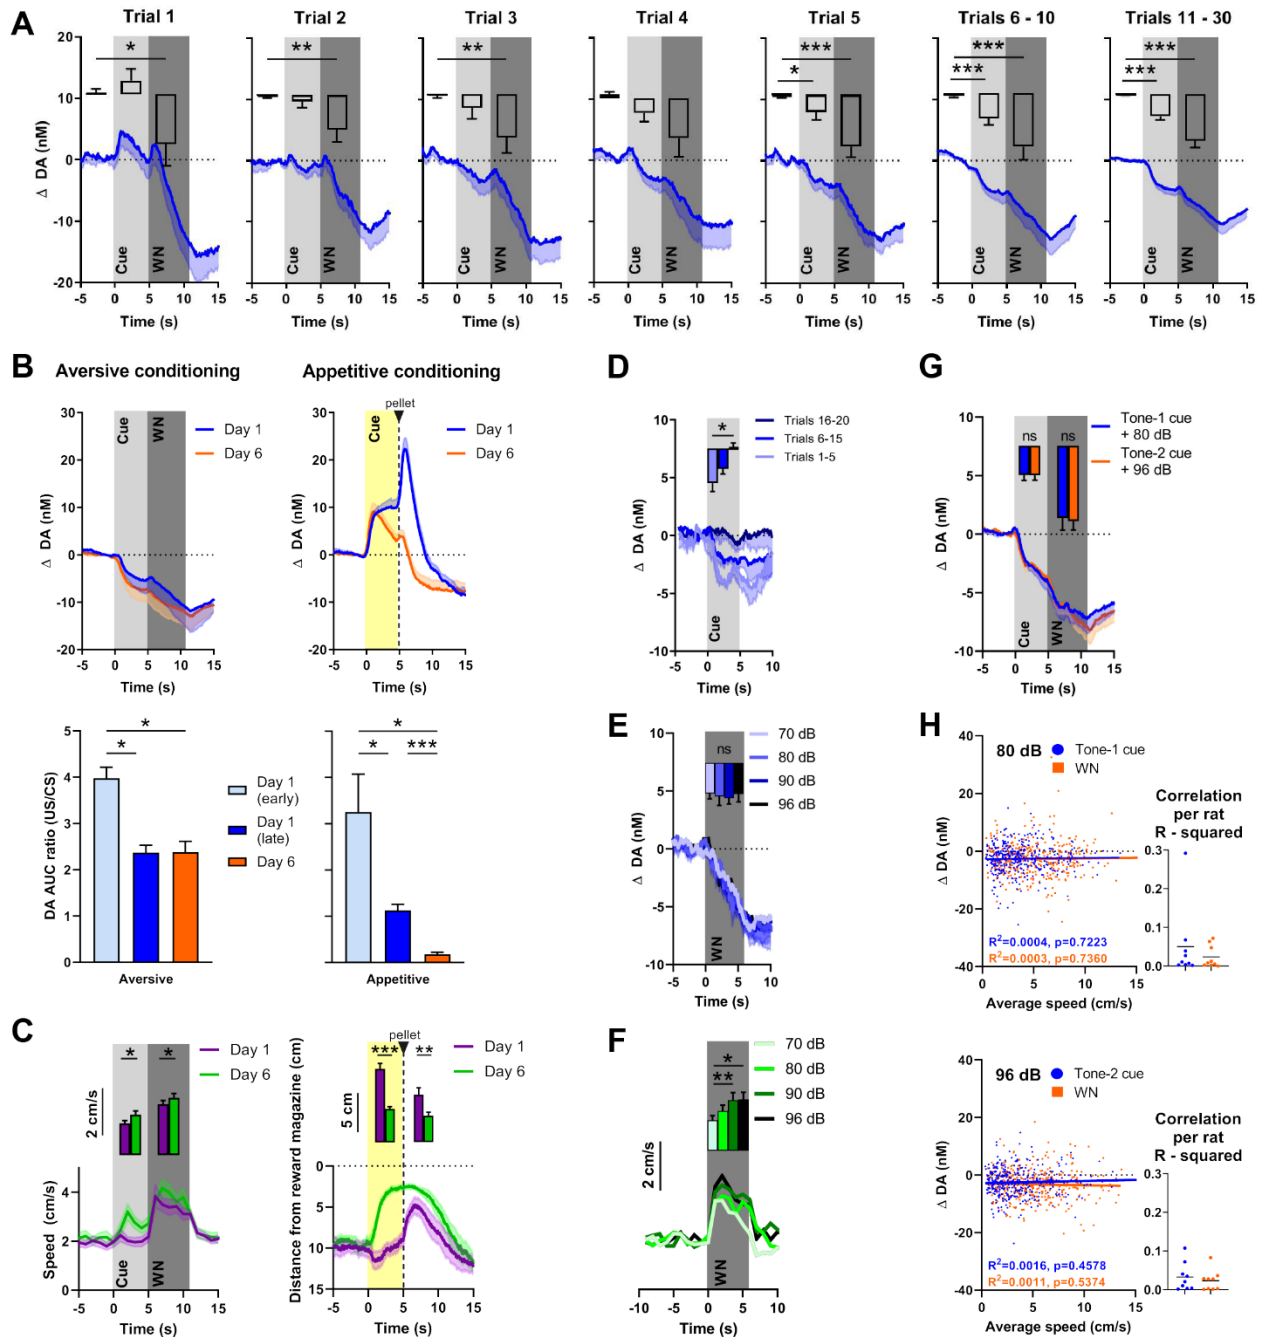

185 **Figure 2 - NAC dopamine signaling and rat behavior during Pavlovian WN-cue conditioning**  
 186 **and varying WN intensities. (A)** Average extracellular concentrations of dopamine (DA; in nM) in  
 187 the NAC (dark-blue line; SEM is shaded light-blue) during the first 30 pairings of cue (5 s tone) and  
 188 WN (6 s, 90 dB) (16 rats). To illustrate the immediate, unconditioned effects of WN, the first five trials  
 189 are displayed individually. The bar-graph insets depict dopamine release (+SEM) averaged for  
 190 baseline, cue, and WN epochs. WN decreased dopamine significantly in all trials, except trial 4. The  
 191 WN-paired cue began to decrease dopamine significantly starting at trial 5. **(B)** Comparison of  
 192 dopamine release during aversive (left,  $n = 4$ ) and appetitive (right,  $n = 10$ ) Pavlovian conditioning.  
 193 Top: Subsecond changes in dopamine concentration (nM) on day 1 (blue) and day 6 (orange).  
 194 Bottom: Ratio (+SEM) of AUCs between the CS and US (US/CS) on day 1 (early and late trials) and  
 195 day 6 during aversive (left) and appetitive (right) conditioning. For aversive conditioning, dopamine  
 196 differed between day 1 (early) and day 1 (late) ( $p = 0.0138$ ), and between day 1 (early) and day 6 ( $p =$   
 197  $0.0318$ ). For appetitive conditioning, a significant difference was found between early and late  
 198 conditioning on day 1 ( $p=0.0441$ ) and dopamine differed between day 1 (early) ( $p = 0.0102$ ) and day 1

199 (late) ( $p < 0.0001$ ) compared to day 6. **(C)** Conditioned behavioral response corresponding to (B).  
200 Left: During aversive conditioning, locomotion speed during cue presentation increased from day 1 to  
201 day 6 ( $Z = , p = 0.0491$ ), and also during WN ( $Z = -2.343, p = 0.019$ ) ( $n = 17$ ). Right: During  
202 appetitive conditioning, time spent in proximity of the reward magazine increased between day 1 and  
203 6 both during cue presentation ( $t(9) = 6.962, p < 0.0001$ ) and after pellet delivery ( $t(9) = 2.572, p =$   
204  $0.0301$ ). **(D)** In an extinction session, for 20 consecutive trials, WN was withheld after cue  
205 presentation ( $n = 6$ ), and dopamine differed significantly between trials 1-5 and 16-20 ( $p = 0.0133$ ).  
206 **(E)** In contrast, we detected no differences in dopamine release between exposure to varying WN  
207 intensities (70, 80, 90, or 96 dB; ( $F(2.380, 11.90) = 0.1655, p = 0.8813$ ),  $n = 6$ ). **(F)** While we do find a  
208 main effect of WN intensity on locomotion speed ( $\chi^2(3) = 13.80, p = 0.0032$ ) and significant  
209 differences between 70 and 90 dB ( $p = 0.005$ ) and 70 and 96 dB ( $p = 0.0143$ ) ( $n = 13$ ). **(G)** We  
210 observed no significant differences in dopamine during cue ( $Z = -0.059, p = 0.953$ ) or WN ( $Z = -0.178,$   
211  $p = 0.859$ ) when two separate tones were used as predictors for 80-dB (blue) or 96-dB (orange) WN  
212 ( $n = 9$ ). **(H)** Trial-by-trial correlation between locomotion speed and dopamine concentration during  
213 cue (blue) and WN (orange) for either 80-dB (top) or 96-dB WN (bottom) were not significant. Each  
214 dot represents one trial. Trials from all animals ( $n = 9$ ) were pooled. Top left: No correlation during 80-  
215 dB WN ( $R^2 = 0.0016, p = 0.457$ ) or its cue ( $R^2 = 0.0004, p = 0.7223$ ). Bottom left: No correlation during  
216 96-dB WN ( $R^2 = 0.0011, p = 5374$ ) or its cue ( $R^2 = 0.0003, p = 0.7360$ ). Right:  $R^2$  values calculated  
217 separately for each individual rat confirms there is no significant correlation between locomotion  
218 speed and dopamine.

219 One possible explanation for an incomplete shift of dopamine signaling from WN to cue is that 30  
220 pairings are insufficient to fully acquire the association. Therefore, we conditioned a subset of rats ( $n$   
221  $= 4$ ) for five additional days. Another group of rats ( $n = 10$ ) received food-pellet rewards paired with a  
222 predictive cue to compare the temporal dynamics of aversive (90-dB WN; Figure 2B, left) and  
223 appetitive (reward) conditioning (Figure 2B, right). Changes in dopamine are illustrated across time  
224 (Figure 2B, top), and in order to quantify the shift of the dopamine response from the US to the CS,  
225 we calculated the ratio between the areas under the curve (AUC) of the US and the CS during the  
226 very first trials of conditioning ('early day 1'), the rest of the trials of day 1 ('late day 1') and on the sixth  
227 day of conditioning ('day 6') (see bottom figure 2B). During aversive conditioning we find, using a  
228 mixed-effects analysis, a significant main effect of the amount of conditioning ( $F(0.9586,$   
229  $2.396)=117.3, p =0.0043$ ), and post hoc testing using Tukey's multiple comparisons test reveals  
230 significant differences between the ratios of day 1 early trials and day 1 later trials ( $p = 0.0138$ ), as  
231 well as between day 1 early trials and day 6 ( $p = 0.0318$ ). However, no difference was observed  
232 between day 1 later trials and day 6 ( $p = 0.9852$ ). During appetitive conditioning we also find a main  
233 effect of the amount of conditioning on the ratio between the US and the CS ( $F(1.034,8.788)=13.88,$   
234  $p=0.0047$ ) and in contrast to aversive conditioning the ratio on day 6 is significantly different from both  
235 day 1 early trials ( $p=0.0102$ ) and day 1 later trials ( $p<0.0001$ ). In addition, we find a significant  
236 difference between day 1 early trials and day 1 later trials ( $p=0.0441$ ). The comparison of conditioned  
237 behavioral responses to 90-dB WN between day 1 and day 6 using Wilcoxon-signed rank tests and a  
238 Holm-bonferonni correction for multiple comparisons reveals an increase in locomotion speed (Figure  
239 2C, compared to baseline which, on day 1, was restricted to the WN epoch alone (Cue:  $Z = -0.876,$   
240  $p=0.381$ . WN:  $Z = -3.621, p <0.0001$ ). On day 6 we observe an increase in locomotion speed during  
241 both the cue ( $Z = -3.053, p = 0.002$ ) and WN ( $Z = -3.621, p < 0.0001$ ) epoch compared to baseline  
242 which are both also significantly higher compared to day 1 (cue:  $Z = - 2.485, p = 0.013$ . WN:  $Z = -$



243 2.343,  $p = 0.019$ ). During appetitive conditioning we see the same temporal evolution in the  
244 conditioned response, where rats approach the reward magazine more during the cue epoch on day 6  
245 compared to day 1 ( $t(9) = 6.962$ ,  $p < 0.0001$ ). However, during appetitive conditioning, but not during  
246 aversive conditioning, an almost complete shift of the dopamine response from the CS to the US  
247 occurred. Together, these results demonstrate distinct differences in the temporal dynamics of  
248 dopamine signaling during aversive and appetitive conditioning.

#### 249 **Extinction of cue-induced dopamine signaling**

250 In addition to having monitored the quick acquisition of the cue's dopamine-decreasing properties  
251 (Figure 2A), to further verify that these properties were a learned response, we tested how fast the  
252 association between cue and WN could be extinguished. Rats with well-established cue-WN  
253 associations (that were conditioned for more than 6 days) were exposed to 20 consecutive trials in  
254 which WN was omitted. Using a Friedman test, we found a significant effect of extinction ( $\chi^2(2) = 8.4$ ,  
255  $p = 0.005$ ). Post-hoc analysis using a Dunn's multiple comparison test revealed a significant  
256 difference between the decrease in extracellular dopamine concentration of trials 1 - 5 and trials 16 -  
257 20 ( $p = 0.0133$ , Figure 2D), with the latter no longer showing a decrease in dopamine. Thus, over the  
258 course of 15 extinction trials, the cue lost its conditioned dopamine response.

#### 259 **NAC dopamine does not reflect WN intensity and WN-induced behavior**

260 For the previous experiments, we used WN with an intensity of 90 dB. We asked whether WN of  
261 different intensities would differentially influence extracellular dopamine in the NAC, since we  
262 observed increased avoidance of higher intensities of WN (Figure 1B). First, we tested whether there  
263 is a dose-response relationship between different WN intensities and dopamine. We exposed rats ( $n$   
264 = 6) to four different intensities of WN (70, 80, 90 and 96 dB), which were delivered in a semi-random  
265 order (Figure 2E). Although all WN intensities decreased dopamine release, we found no significant  
266 effect of intensity on extracellular dopamine ( $F(2.380, 11.90) = 0.1655$ ,  $p = 0.8813$ ). In order to  
267 confirm the rats' capability to discriminate between the different WN intensities in this experimental  
268 setting, we exposed additional rats to the same intensities and quantified their locomotion speed  
269 (Figure 2F;  $n = 13$ ). In contrast to dopamine release, we do find a main effect of WN intensities on  
270 baseline-subtracted locomotion speed ( $\chi^2(3) = 13.80$ ,  $p = 0.0032$ ) and significant differences between  
271 70 and 90 dB ( $p = 0.005$ ) and 70 and 96 dB ( $p = 0.0143$ ), which demonstrates that rats were able to  
272 discriminate between the different WN intensities. In a different experiment, we trained rats ( $n = 9$ ) on  
273 an aversive conditioning paradigm in which two cues (2 kHz or 8 kHz tones) predicted exposure to 6s  
274 of either 80-dB or 96-dB WN, respectively (Figure 2G). Again, no significant differences were found in  
275 extracellular dopamine release between WN intensities ( $Z = -0.178$ ,  $p = 0.859$ ), nor between the  
276 effects of their respective predicting cues ( $Z = -0.059$ ,  $p = 0.953$ ). Both of these experiments indicate  
277 that extracellular dopamine in the NAC does not encode WN intensity, and, therefore, the relative  
278 aversiveness or aversive value of WN is not encoded by NAC dopamine in the NAC.

279 Many studies have demonstrated the involvement of dopamine in movement (e.g., Syed *et al.*, 2015;  
280 Alves da Silva *et al.*, 2018; Cuddington & Dudman, 2019). Therefore, we tested if a correlation  
281 between locomotion speed and extracellular dopamine concentration existed during cue and WN  
282 epochs. We performed a trial-by-trial analysis for both 80-dB (Figure 2H, top) and 96-dB (figure 2H,  
283 bottom) WN exposures and found no correlation during the cue (80 dB:  $R^2 = 0.0004$ ,  $p = 0.7223$ ; 96  
284 dB:  $R^2 = 0.0003$ ,  $p = 0.7360$ ) nor during WN (80 dB:  $R^2 = 0.0016$ ,  $p = 0.4578$ ; 96 dB:  $R^2 = 0.0011$ ,  $p =$   
285  $0.5374$ ). The dots in the inset graphs represent the  $R^2$  values of the average locomotion speed and  
286 dopamine concentrations during the cue and WN period in the recording session for each individual  
287 animal.

### 288 **NAC dopamine signals contain little prediction error**

289 Although the WN-predictive, conditioned cue acquired the ability to reliably suppress NAC dopamine  
290 release, no substantial transfer of this effect from US to CS occurred (a prerequisite for a prediction  
291 error signal). To further evaluate whether NAC dopamine might function as an APE, we introduced  
292 several deviations from the expected outcomes. First, we exposed rats to two different cues (2 kHz or  
293 8 kHz tones) that were associated with different probabilities followed by either 80-dB or 96-dB WN  
294 (see Figure 3A). Even though dopamine did not encode WN intensity, we hypothesized that dopamine  
295 may nonetheless convey an error component to be reflected as diminished dopamine decrease during  
296 the better-than-expected condition (occurrence of low-probability (25%) 80-dB WN), and augmented  
297 decrease in dopamine during the worse-than-expected condition (occurrence of low-probability (25%)  
298 96-dB WN). As expected, we did not observe differences in dopamine release during the cue epoch  
299 due to the uncertainty of which intensity would follow (Tone 1:  $t(8) = 0.5983$ ,  $p = 0.5662$ , Figure 3B;  
300 Tone 2:  $t(8) = 1.432$ ,  $p = 0.1901$ , Figure 3C). However, during the WN epoch, we also did not find  
301 significant differences between the two intensities, neither for tone 1 ( $t(8) = 0.6698$ ,  $p = 0.5218$ ), nor  
302 for tone 2 ( $t(8) = 0.4452$ ,  $p = 0.6680$ ). Together, these results indicate that the prediction error of  
303 outcomes deviating from expected probability is not encoded by NAC dopamine concentrations.

304 Since WN intensity had little influence on dopamine release, we investigated whether an APE was  
305 detectable when deviations from the expected outcome occurred in the temporal domain (i.e.,  
306 duration of WN). We randomly exposed rats to a small number of probe trials with a) a longer-than-  
307 predicted 90-dB WN (12s instead of 6s), in other words a worse-than-predicted outcome (Figure 3D),  
308 b) omitted WN, in other words a better-than-predicted outcome (Figure 3E), or c) unpredicted WN, in  
309 other words another version of a worse-than-predicted outcome, but in this case lacking the prediction  
310 completely (Figure 3F). These three types of probe trials were implemented in a session in which the  
311 first 30 trials consisted of exclusive, deterministic pairings of cue (5s) and 90-dB WN (6s), after which  
312 these regular predicted WN trials were intermixed with the above-mentioned probe trials. During the  
313 worse-than-predicted WN trials where the WN was extended by 6s, we observed an extended  
314 suppression of dopamine, which decreased with the same rate as during the initial 6s, and which  
315 ceased immediately upon termination of WN, resulting in a overall lower dopamine concentration in  
316 the 11-25 s epoch (Figure 3D;  $t(10) = 1.863$ ,  $p = 0.046$ , after Holm-Bonferroni correction for multiple

317 comparisons). During better-than-predicted trials (omitted WN), we found overall higher  
 318 concentrations of dopamine in the 5-20 s epoch (Figure 3E;  $t(10) = 3.751$ ,  $p = 0.0019$ , after Holm-  
 319 Bonferroni correction). For the unpredicted WN, which constitutes a prediction error since the  
 320 predictive cue is lacking, we aligned dopamine concentrations for predicted and unpredicted WN at its  
 321 onset, in order to compare the impact of WN per se. We observed significantly lower dopamine  
 322 concentrations exclusively in the epoch after the termination of the WN (Figure 3F; 11-25 s,  $t(10) =$   
 323 2.453,  $p = 0.0170$ , after Holm-Bonferroni correction), but not during the WN epoch itself.

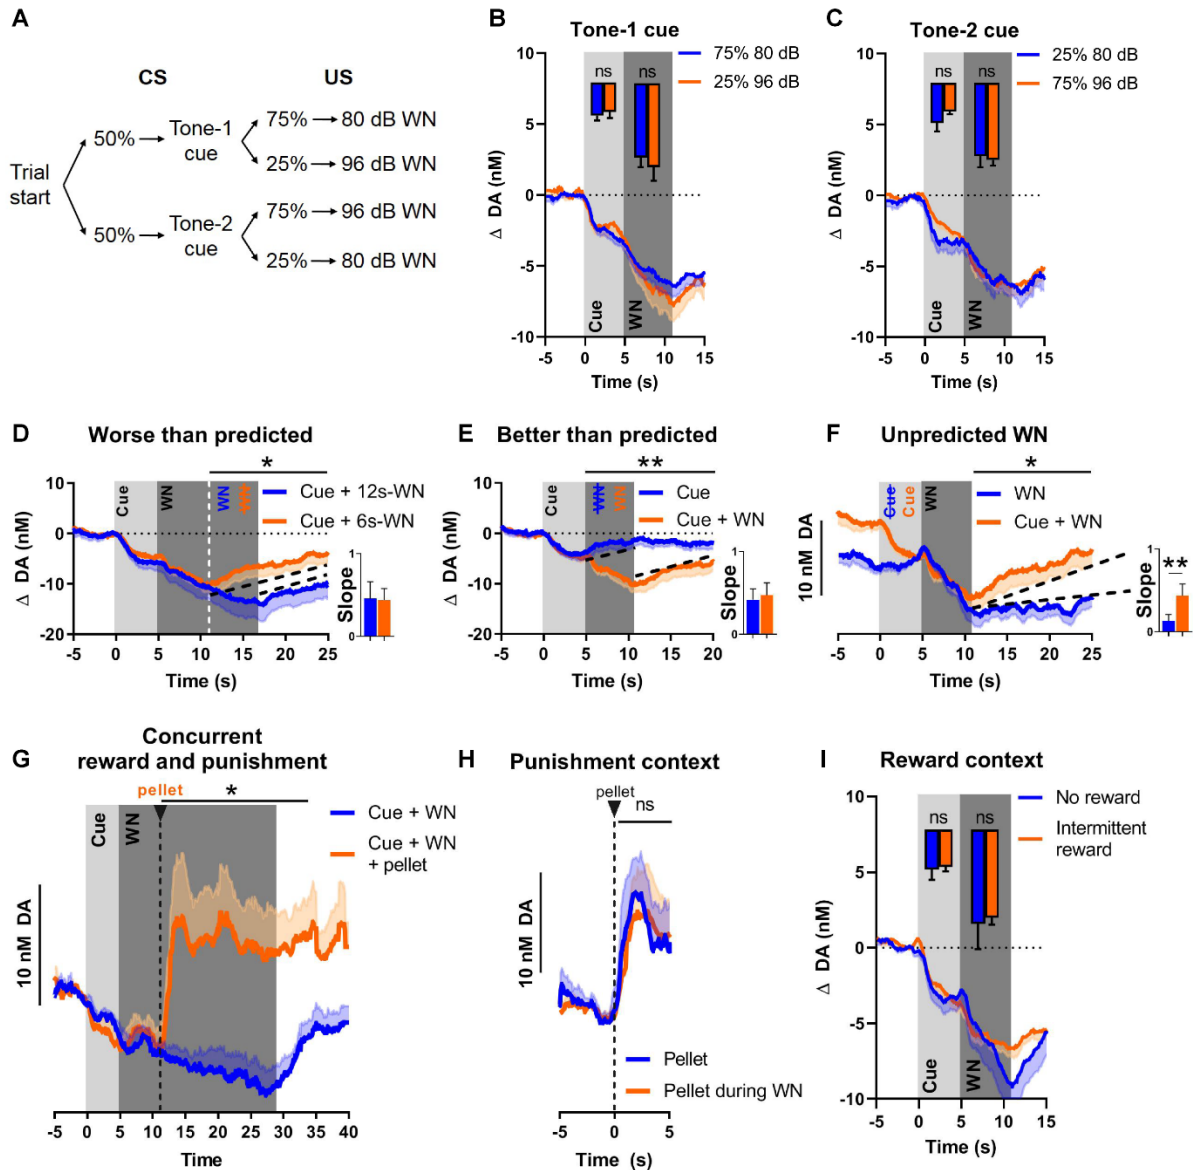

324 **Figure 3 - NAC dopamine consistently tracks prediction and duration of WN with little aversive**  
 325 **prediction-error function.** (A) Trial structure of the probabilistic Pavlovian WN task. (B) Dopamine  
 326 concentration in the probabilistic task during the presentation of tone-1 cue, which was followed by  
 327 80-dB WN (blue) in 75% of trials and by 96-dB WN (orange) in the remaining 25% of trials. Bar-graph  
 328 inset: No significant differences in average dopamine concentration ( $n = 9$ ) during cue ( $t(8) = 0.5983$ ,  
 329  $p = 0.5662$ ) and WN ( $t(8) = 0.6698$ ,  $p = 0.5218$ ). (C) Dopamine concentration in the probabilistic task  
 330 during the presentation of tone-2 cue, which was followed by 80-dB WN (blue) in 25% of trials and by  
 331 96-dB WN (orange) in the remaining 75% of trials. Bar-graph inset: No significant differences in

332 average dopamine concentration ( $n = 9$ ) during cue ( $t(8) = 1.432$ ,  $p = 0.1901$ ) and WN ( $t(8) = 0.4452$ ,  
333  $p = 0.6680$ ). **(D)** Comparison of dopamine between predicted 6s-WN (orange) and worse-than-  
334 predicted 12s-WN (blue) ( $n = 11$ ) demonstrates significantly lower average dopamine in the epoch  
335 between 11-25 s during worse-than-predicted 12s-WN ( $t(10) = 1.863$ ,  $p = 0.046$ ). Bar graph (right):  
336 Slopes of dopamine-concentration trajectories (black dotted lines) show no significant difference  
337 between worse-than-predicted and predicted WN ( $Z = -1.432$ ,  $p = 0.0775$ ). **(E)** Comparison of  
338 dopamine between predicted 6s-WN (orange) and better-than-predicted, omitted WN (blue) ( $n = 11$ )  
339 demonstrates significantly higher average dopamine in the epoch between 5-20 s during better-than-  
340 predicted, omitted WN ( $t(10) = 3.751$ ,  $p = 0.0019$ ). Bar graph (right): Slopes of dopamine-  
341 concentration trajectories (black dotted lines) show no significant difference between better-than-  
342 predicted and predicted WN ( $Z = 1.334$ ,  $p = 0.091$ ). **(F)** Comparison of dopamine between predicted  
343 6s-WN (orange) and unpredicted 6s-WN (blue) ( $n = 11$ ) demonstrates significantly lower average  
344 dopamine in the epoch between 11-25 s during unpredicted WN ( $t(10) = 2.453$ ,  $p = 0.0170$ ). Bar  
345 graph (right): Slopes of dopamine-concentration trajectories (black dotted lines) show a significantly  
346 flatter slope during unpredicted WN compared to predicted WN ( $Z = -2.490$ ,  $p = 0.0065$ ). **(G)**  
347 Dopamine release during prolonged 24s-WN exposure (blue) continues to incrementally decrease  
348 over time. Unexpected reward delivery ( $n = 6$ ) during such 24s-WN (orange) induces an increase in  
349 dopamine in the epoch between 11-35 s ( $t(5) = 3.108$ ,  $p = 0.0266$ ). **(H)** Comparison of dopamine after  
350 unexpected pellet delivery (blue) and after unexpected pellet delivery during WN exposure (orange) ( $n$   
351  $= 6$ ) show no significant difference in average dopamine in the epoch between 0-5 s ( $t(5) = 0.08753$ ,  $p$   
352  $= 0.9336$ ). **(I)** Comparison of dopamine during WN exposure in a testing context without rewards  
353 (blue) and a testing context with intermittent rewards (orange) ( $n = 6$ ) shows no significant difference  
354 in average dopamine during the cue ( $t(5) = 0.2841$ ,  $p = 0.7877$ ) and WN ( $t(5) = 0.3151$ ,  $p = 0.7654$ ).

355 Although we did not detect a dopamine error-signal during exposure to WN (i.e., deviations from  
356 expected WN), we hypothesized that such unexpected events may alter dopamine after WN-offset.  
357 Thus, we compared the slope (or rate) of change of dopamine concentration during the recovery  
358 epoch (after WN cessation), since using slope allows for integration of the change in dopamine  
359 concentration over time, when the animals were presented with deviations from the predicted aversive  
360 event. Specifically, we found no significant slope difference between fully predicted WN trials and  
361 “worse-than-expected” trials ( $t(10) = 0.1511$ ,  $p = 0.4415$ , after Holm-Bonferroni correction, Figure 3D,  
362 bar graph) or “better-than-expected” trials ( $t(10) = 0.4809$ ,  $p = 0.3205$ , after Holm-Bonferroni  
363 correction, Figure 3E, bar graph). Thus, when our rats were exposed to unexpectedly extended WN or  
364 to the unexpected omission of WN, dopamine concentration reflected only the duration of WN  
365 exposure, but not a prediction error. In contrast, we found a significant difference in recovery slope  
366 between unexpected and expected WN ( $t(10) = 2.895$ ,  $p = 0.0080$ , after Holm-Bonferroni correction,  
367 Figure 3F, bar graph), which indicates that, in the case of an unexpected aversive stimulus, dopamine  
368 does not only track the duration of this aversive stimulus, but displays a differential response and,  
369 thus, may serve as a qualitative teaching signal.

### 370 **Dopamine integrates information about appetitive and aversive stimuli**

371 We then investigated whether dopamine could still encode rewards during ongoing WN exposure, i.e.  
372 while extracellular dopamine concentrations are continuously decreasing. To test this, we delivered  
373 food pellets unexpectedly during a prolonged WN epoch. We observed a significant increase in  
374 dopamine release upon pellet delivery ( $t(5) = 3.108$ ,  $p = 0.0266$ , Figure 3H), which was comparable to  
375 the increase in dopamine release we observed upon pellet delivery in the absence of WN ( $t(5) =$

376 0.08753,  $p = 0.9336$ , Figure 3I). These results indicate that dopamine is still responsive to rewarding  
377 events during an aversive event and, thus, integrates information about appetitive and aversive  
378 events.

379 A previous study reported that dopamine is more prone to encode an APE in an experimental context  
380 with a low probability of intermittent reward delivery (Matsumoto *et al.*, 2016). Thus, we compared  
381 dopamine release during cue and WN exposure embedded in two task contexts with different reward  
382 probabilities (i.e., different “reward contexts”). In the first task context, no rewards were delivered  
383 during the entire session, whereas in the second context a low chance of reward delivery existed  
384 (reward-trial probability = 0.1). We did not observe a significant difference in dopamine concentration  
385 between these reward contexts during the cue epoch ( $t(5) = 0.2841$ ,  $p = 0.7877$ ), nor during the WN  
386 epoch ( $t(5) = 0.3151$ ,  $p = 0.7654$ ) (Figure 3J). Consistently, in another experiment, we did not observe  
387 a significant difference in dopamine concentration (during cue and WN epochs) when comparing a no-  
388 reward context with a high-reward context (reward-trial probability= 0.5; cue:  $t(17)=1.448$ ,  $p=0.0829$ ,  
389 WN:  $t(17)=1.428$ ,  $p=0.0857$ ; data not shown).

390

## 391 **DISCUSSION**

392 In this study, we set out to delineate the role of the dopamine system in processing aversive stimuli,  
393 by systematically investigating subsecond fluctuations in rat NAC dopamine concentration in response  
394 to an aversive auditory stimulus (WN), as well as its prediction by auditory tone cues. First, we  
395 validated the aversiveness of WN in a real-time place-preference task and in an operant task, where  
396 we found that WN aversiveness scales with loudness. Trial-by-trial analysis of the first WN exposures  
397 revealed that WN as an unconditioned stimulus diminishes the concentration of extracellular  
398 dopamine in the NAC, and that a predicting cue rapidly takes on the roll of conditioned stimulus  
399 (reversible by extinction), eliciting WN-like behavioral activation and dopamine depression. Dopamine  
400 during cue and WN was not correlated with locomotion speed. In contrast to appetitive conditioning,  
401 only a very limited temporal shift of the dopamine response from WN to the cue occurred. Dopamine  
402 responses to WN and its predictive cue were not affected by aversive value (WN intensity), context  
403 valence (introduction of intermittent rewards), or probabilistic contingencies. Instead, prediction and  
404 duration of the aversive WN were accompanied by a relatively slow and steady decrease in NAC  
405 dopamine concentration (a declining ramp that continued without plateauing for at least 24 seconds),  
406 which was followed by an equally slow recovery of dopamine upon cessation of WN. The slope of this  
407 rebounding dopamine ramp was altered only by unpredicted presentation of WN (not by better-than-  
408 predicted or worse-than-predicted outcomes), revealing a function of dopamine that sometimes goes  
409 beyond simple real-time tracking the presence of conditioned and unconditioned aversive stimuli.  
410 Finally, we find the integration of rewarding and aversive stimuli is of parallel nature, as WN-  
411 associated dopamine depression did not modify the rapid surge of dopamine triggered by unexpected



412 reward delivery. Together, our findings indicate that negative dopamine signals in the NAC mostly  
413 track the prediction and duration of aversive events, with few aspects that are consistent with an APE.

414 **WN is a versatile aversive stimulus that suppresses dopamine release and increases**  
415 **locomotion**

416 We chose WN as an aversive stimulus to probe the limbic dopamine system's role in aversive  
417 conditioning, as it has several advantages compared to more commonly-used aversive stimuli. First,  
418 WN is mildly to moderately aversive (Campbell & Bloom, 1965; Hughes & Bardo, 1981), and as such  
419 does not induce freezing, but instead provokes mild behavioral activation. This is particularly relevant  
420 with regard to studies relating dopamine function to behavioral read-outs, since lack of movement is  
421 often associated with diminished activity of the dopamine system and, thus, may confound the  
422 interpretation of negative dopamine signals in the context of aversive events. Second, WN is reliably  
423 effective and tolerated across many trials and sessions, supporting the detection of neuronal signals  
424 by providing sufficient data for averaging across trials and enabling complex experiments with varying  
425 valence and contingencies. Third, WN is distinct, well-controllable, and easy to produce, where  
426 intensity and duration can be titrated effortlessly. Fourth, WN does not require attention to be detected  
427 (i.e., the animal will hear it anywhere in an experimental environment). Fifth, animals cannot interfere  
428 with WN delivery, as opposed to air puffs or electric foot shocks, which can be influenced by the  
429 animal's actions and position (i.e., closing its eyelids or decreasing contact surface with the charged  
430 grid floor). Sixth, WN does not interfere with data recording in FSCV, electrophysiology, or  
431 fluorescence imaging. Together, the above-mentioned merits make WN an experimentally valuable  
432 stimulus with great potential to uncover aversion-relevant brain mechanisms.

433 In the presented work, we report that WN diminishes extracellular dopamine concentration in  
434 the NAC upon first exposure, characteristic of an unconditioned stimulus or primary reinforcer. A  
435 predicting cue quickly adopted this property upon subsequent exposures, which was reversible by  
436 extinction. Such dopamine responses were stable across trials and sessions. Interestingly, the use of  
437 WN revealed a rare relationship between dopamine and behavior: Increased locomotion speed was  
438 associated with a decrease in dopamine release. Behavioral activation is usually associated with  
439 increased dopamine signaling (Boureau & Dayan, 2011; Berridge & Robinson, 1998; Alves da Silva *et al.*,  
440 2018; Cuddington & Dudman, 2019), whereas a lack of movement or even freezing, depending on  
441 stimulus intensity, is often associated with decreased dopamine (e.g., Oleson *et al.*, 2012;  
442 Badrinarayan *et al.*, 2012). These frequently-observed association patterns have prompted the  
443 hypothesis that the directionality of changes in dopamine concentration reflects the chosen strategy:  
444 An active or passive behavioral reaction to aversive events (Badrinarayan *et al.*, 2012). Our results,  
445 however, prove that this hypothesis is not universally applicable. The behavioral activation we  
446 observe in response to WN might reflect an increased motivation to escape, which we cannot  
447 ascertain as our task was Pavlovian (thus, without an active avoidance component: the WN was  
448 inescapable). Notably, the observed decline in dopamine was not at all correlated with movement on

449 a trial-by-trial basis; thus, it is conceivable that during mild WN exposure, NAC dopamine was  
450 uncoupled from its usual, more direct behavioral impact.

#### 451 **What is and what is not encoded by NAC dopamine?**

452 Many studies have investigated the role of dopamine in aversion by testing the system's reaction to  
453 the exposure to aversive stimuli (see above), but only a few scrutinize dopamine's precise function  
454 therein, or whether dopamine encodes a "true" APE. Their conclusions range from "dopamine is  
455 insensitive to aversiveness" (Fiorillo, 2013), to the other extreme of "dopamine serves as an APE"  
456 (Matsumoto *et al.*, 2016). Fiorillo (2013) ruled out the existence of a dopamine APE because 1)  
457 dopamine-neuron firing did not differ between presentation of aversive and neutral stimuli, 2)  
458 prediction of an aversive event did not affect firing, and 3) no integration of rewarding and aversive  
459 values was observed. In contrast, Matsumoto *et al.* (2016) found evidence for all three of these  
460 requirements and, therefore, concluded that dopamine neurons are capable of encoding a value  
461 prediction error (equally for both rewards and aversive stimuli). This discrepancy could partially be  
462 explained by the fact that Matsumoto *et al.* (2016) recorded from dopaminergic neurons in the VTA (of  
463 mice), whereas the majority of the neurons that Fiorillo (2013) recorded were in the substantia nigra  
464 (of monkeys). Since we measured extracellular concentrations of NAC dopamine, which is released  
465 from terminals that originate from neurons in the VTA (Ikemoto, 2007), we expected to find an APE in  
466 our data.

467         Indeed, our results meet Fiorillo's (2013) three requirements for an APE stated above: 1)  
468 During the first pairing of cue and WN, when the predictive auditory cue was still neutral, dopamine  
469 concentration during the WN epoch differed significantly from that during baseline and cue  
470 presentation, but the latter (cue and baseline dopamine) did not differ from each other. 2) After only  
471 four cue-WN pairings, cue presentation diminished dopamine concentration, thus prediction of the  
472 aversive event did alter dopamine activity. Although we did not find a significant difference in overall  
473 dopamine concentration between predicted and unpredicted WN, we did observe a difference in their  
474 post-WN recovery slopes. 3) Finally, although we did not detect an "interactive" integration (modulated  
475 signal) of aversive and reward values during concurrent presentation of WN and a food pellet (as the  
476 absolute magnitude of released dopamine was equal to that of a pellet delivered outside of WN  
477 exposure), both the rewarding and aversive stimuli were encoded in parallel. The signals are thus  
478 integrated in the sense that both are processed at the same time, in an additive manner; as opposed  
479 to an exclusive organization, where the dopamine system may be "turned off" or unresponsive  
480 towards rewards during the presence of an aversive stimulus. Taken together, up to this point, our  
481 results fit best with the conclusion of Matsumoto *et al.* (2016); although a noteworthy contrast is that in  
482 our data, context was irrelevant to the magnitude of dopamine response to the aversive event and  
483 reward: It made no difference for the acute dopamine response magnitude whether the aversive  
484 stimulus was delivered in rewarding contexts or not.

485         Next, however, we took inspiration from Hart *et al.* (2014), who used a mathematical  
486 approach developed by Caplin and Dean (2007) to confirm the encoding of RPE signals by NAC

487 dopamine. They used a deterministic and a probabilistic choice task in order to determine whether  
488 dopamine signals fulfilled three axioms that were considered necessary for a RPE signal: “consistent  
489 prize ordering”, “consistent lottery ordering”, and “no surprise equivalence”. We employed the above-  
490 mentioned deterministic and probabilistic Pavlovian conditioning tasks to identify an APE, instead of  
491 an RPE, by exposing rats to low- and high-dB WN, predicted by two different tones, with either a  
492 100% probability (deterministic task) or with different probabilities (probabilistic task). We did not  
493 observe differences in dopamine concentration during the WN epoch in the deterministic task, which  
494 fulfills the third axiom (no surprise equivalence), since the prediction error is zero for both of these  
495 conditions. But the first two axioms were not fulfilled, since we did not detect differences in dopamine  
496 during the WN epoch, when different WN intensities were presented with different probabilities. Rats  
497 avoided higher-dB WN more than lower-dB WN (Figure 1B) and exhibited WN dB-dependent  
498 locomotor activation (Figure 2F), indicating that WN aversiveness scales with WN intensity and that  
499 rats are able to discriminate between different WN intensities. Thus, we conclude that the NAC  
500 dopamine signals we observed did not fulfill the axiomatic criteria of an APE, when aversive-stimulus  
501 intensity or value was varied.

502 Finally, we performed experiments to probe the dopamine signal in conditions where the  
503 aversive stimulus deviated from the expected duration, in other words, when trials were worse or  
504 better than predicted based on WN duration, but with a stable intensity of 90 dB. First, we extended  
505 WN duration or omitted WN in occasional trials. Extended WN elicited a continuation of the same  
506 declining dopamine-concentration slope, which ceased promptly at WN cessation, after which  
507 dopamine slowly ramped back up towards baseline with a reversed, inclining slope. Thus, although  
508 the signal reflected the duration of extended WN, no discernable error component was evident. When  
509 WN was omitted, we did not observe an error signal either: Instead, again, the signal slowly returned  
510 to baseline levels. Second, in another version of the “worse-than-expected” condition, we occasionally  
511 delivered WN unexpectedly, without a preceding cue (after animals had learned the cue-WN  
512 association well), and observed a difference in the recovery slope after WN-offset as compared to  
513 predicted WN. This flattened recovery slope indicates that NAC dopamine signals more than simply  
514 track the presence of aversive stimuli; in addition, it may relate to the failed anticipation of an aversive  
515 event (based on reliance on the predictive cue), and, thus, indicate altered cue-WN contingencies. In  
516 summary, we conclude that dopamine precisely tracks aversive-stimulus duration, and the only  
517 evidence of an APE-like signal in our data was found after unpredicted WN, whereas several of our  
518 other experimental accounts are incompatible with an APE function of NAC dopamine. This places  
519 our results firmly in the middle ground between the no-APE (Fiorillo, 2013) and the full-APE  
520 conclusions (Matsumoto *et al.* 2016) described above.

## 521 **Aversion versus reward**

522 Consistent with most literature (Badrinarayan *et al.*, 2012; Oleson *et al.*, 2012; DeJong *et al.*, 2019;  
523 Stelly *et al.*, 2019), we find that NAC dopamine encodes rewarding and aversive events with opposite  
524 directionality. Furthermore, we report that a cue predicting an aversive stimulus can adopt the ability

525 to prompt a decrease in dopamine the way the aversive stimulus itself would. Taken together, this  
526 suggests that NAC dopamine encodes both reward and aversive prediction. However, decreases in  
527 dopamine concentration did not scale with WN intensity, unlike what is well-established for reward  
528 processing, where reward size or probability is encoded both for the reward itself and for predictive  
529 stimuli (Gan *et al.*, 2010; Tobler *et al.*, 2015; Watabe-Uchida *et al.*, 2017). Furthermore, encoding of a  
530 prediction error, which is one of the best characterized features of reward-related dopamine signaling,  
531 did not occur for aversive events. Thus, NAC dopamine does not encode aversive and appetitive  
532 stimuli (and their prediction) in the same way. Moreover, the basic nature of aversion-related  
533 dopamine signals in our data was different from that of rewards. For example, the temporal signal shift  
534 towards the earliest predictor of the respective reinforcing stimulus, as described for rewards, is  
535 incomplete for aversive conditioning. Another example is that reward-related changes in extracellular  
536 dopamine concentration are substantially larger and faster compared to aversive events. These  
537 discrepancies may be partially attributable to general differences between dopamine release into and  
538 removal from the extracellular space. More specifically, the dopamine system presumably has a  
539 bigger dynamic range for increasing activity; it can do so, for example, by increasing the number of  
540 cells firing and their firing frequency (and thereby the total number of dopamine-containing vesicles  
541 being released). In contrast, dopamine-signaling reduction cannot drop below a certain point, since  
542 the cells' maximum response is to cease firing altogether and extracellular dopamine can only be  
543 removed relatively slowly or must diffuse away. This disparity could translate into a structurally-limiting  
544 factor on what can be encoded by a reduction in dopamine concentration and explain some of the  
545 above-mentioned differences in function. However, the slow-ramping declining and recovery slopes  
546 we observed do not reflect the system limits, since the very first exposure to WN resulted in a steeper  
547 decline and rewards given during WN resulted in steeper increases. Furthermore, disparate  
548 qualitative differences were also found in NAC dopamine responses to the presentation of ultrasonic  
549 vocalizations that are associated with rewarding and aversive events (Willuhn *et al.*, 2014b). Taken  
550 together, our results indicate there are a few similarities between dopamine encoding of rewards and  
551 aversive stimuli, but overall find more differences between them - hinting at aversive events being  
552 encoded by NAC dopamine more rudimentarily, in a qualitative instead of quantitative fashion.

553 In summary, our findings demonstrate that WN is a valuable and versatile aversive stimulus that is  
554 well-suited to probe how the brain processes aversive stimuli. Overall, we conclude that dopamine  
555 tracks the anticipation and duration of an aversive event. This tracking materializes as a perpetually  
556 declining dopamine ramp that progresses without altering its slope until offset of the aversive stimulus  
557 (even WN lasting for 24 s did not reach a plateau of minimal dopamine concentration). Such aversion  
558 tracking may play an anticipatory role for certain defensive behaviors, since the animals were  
559 behaviorally activated during the aversive event. Furthermore, we speculate that these slowly ramping  
560 aversion signals may contribute to a qualitative learning signal (other than a quantitative or scalar  
561 APE signal), since the unexpected aversive stimulus elicited a response beyond simply tracking the  
562 stimulus. Thus, we conclude that dopamine tracks both positive and negative valence in their  
563 temporal aspects and prediction, but that quantitatively speaking, the exact value and error is only

564 encoded for rewards, in the upward direction of NAC dopamine concentration. This implies that  
565 aversive value and APEs are encoded in other brain regions.

566

567

568

569

570

## 571 **MATERIALS & METHODS**

### 572 **Animals**

573 Adult male Long-Evans rats (300-400 g) were housed individually and kept on a reversed light-dark  
574 cycle (light on from 20:00 till 8:00) with controlled temperature and humidity. All animal procedures  
575 were in accordance with the Dutch and European laws and approved by the Animal Experimentation  
576 Committee of the Royal Netherlands Academy of Arts and Sciences. 37 rats underwent surgery, 21 of  
577 which exhibited a functional FSCV electrode with a histologically verified location in the NAC, and  
578 were therefore included in the study. An additional 19 rats, which did not undergo surgery, were used  
579 for behavioral tasks. All rats were food-restricted to 90% of their free-feeding bodyweight, and water  
580 was provided *ad libitum*.

### 581 **Stereotaxic surgery**

582 Rats were induced under isoflurane anesthesia and placed into the stereotaxic frame, on an  
583 isothermal pad maintaining body temperature. The analgesic Metacam (0.2mg meloxicam/100 g) was  
584 injected subcutaneously and the shaved scalp was disinfected using 70% ethanol. Upon incision of  
585 the scalp, it was treated with lidocaine (100 mg/ml). Holes were drilled in the cranium and the dura  
586 mater was cleared for targeting the NAC (1.2 mm AP, 1.5 mm ML and -7.1 DV). Chronic carbon-fiber  
587 electrodes (Clark *et al.*, 2010), made in-house, were positioned in the NAC, and an Ag/AgCl reference  
588 electrode was placed in a separate part of the forebrain. The electrodes were secured to screws in the  
589 skull using cranioplastic cement. Following surgery, rats received subcutaneous injection of 2 ml  
590 saline, and were placed in a temperature-controlled cabinet to be monitored for an hour. Rats were  
591 given 1-2 weeks post-surgery to recover before food restriction, behavioral training, and recording.

### 592 **Behavioral procedures**

593 All behavioral experiments, except the real-time place preference task, were conducted in modified  
594 operant boxes (32 x 30 x 29 cm, Med Associates Inc.), equipped with a food magazine (connected to  
595 an automated food-pellet dispenser) flanked by two retractable levers (with cue lights), a house light,



596 multiple tone generators, two WN generators, and metal grid floors (Med Associates Inc.). Each  
597 operant box was surveilled by a video camera. The boxes were housed in metal Faraday cages, that  
598 were insulated with sound-absorbing polyurethane foam. An overview of experiments, animal  
599 numbers, and read-outs is provided in Supplementary Table 1.

#### 600 *Real-time place preference*

601 Rats ( $n = 10$ ) were placed for 30 minutes in a light-shielded, square, Perspex open field (60x60x60  
602 cm), made in-house (Netherlands Institute for Neuroscience (NIN) mechanical workshop). A camera  
603 mounted in the center above the open field recorded the position of the rat, which was tracked in real-  
604 time by the open-source software Bonsai (Lopes *et al.*, 2015). One quadrant (randomly assigned for  
605 each rat) of the open field was paired with exposure to 90-dB WN, which was produced by a WN  
606 generator from Med-Associates Inc., mounted on top of one of the open-field walls. WN was  
607 automatically switched on as long as the head of the rat was present in the chosen quadrant, and  
608 switched off as soon as the rat exited the quadrant. The WN-quadrant position was fixed throughout  
609 the session. The percentage of time rats spent in the WN-paired quadrant was compared to chance  
610 level (25%).

#### 611 *WN and reward choice task*

612 Rats ( $n = 6$ ) were trained to press one of the two levers in the operant box to receive food-pellet  
613 rewards (Dustless precision pellets, 45 mg, Bio-Serv). During the first training days, a single lever was  
614 inserted at variable inter-trial intervals. Pressing this lever prompted delivery of a single food pellet  
615 and immediate retraction of the lever. Omissions (no lever press for 10s) resulted in 10s house-light  
616 illumination. After reaching a 90% success rate, the other lever was introduced in training sessions  
617 that consisted of 20 “forced” trials, in which one of the two levers was presented, followed by 80  
618 choice trials where both levers were presented. Any lever press resulted in delivery of a single food  
619 pellet and retraction of extended levers (marking the end of the trial). After 5 consecutive sessions  
620 with over 90% success rate, we paired reward delivery of one of the levers with simultaneous 5s of  
621 90-dB WN exposure. Rats were trained under these contingencies for 5 days ( $n = 6$ ), after which half  
622 of the animals ( $n = 3$ ) were switched to 96-dB and the other half to 70-dB WN ( $n = 3$ ). After five  
623 sessions, WN intensities were transposed between the two groups of animals for an additional 5  
624 sessions, so that every animal received each WN intensity. In each of these WN sessions, animals  
625 could earn a maximum of 100 pellets (in 100 trials). Both levers were presented simultaneously at a  
626 variable inter-trial-interval averaging 25s (range: 15-35s). Just as at the start of training, one lever  
627 press induced immediate retraction of both levers and prompted reward delivery (end of trial),  
628 whereas omissions (no press within 10s upon lever insertion) ended the trial and resulted in 10s  
629 house-light illumination. We compared the relative number of WN-paired lever presses on the fifth day  
630 of training across different WN-intensities.

#### 631 *FSCV during aversive Pavlovian conditioning with 90-dB WN*

632 On the first day of aversive Pavlovian conditioning, a new group of 16 rats was tethered to the FSCV  
633 recording equipment and placed in the operant box. In this and all paradigms described below, prior to  
634 behavioral session start, two unexpected deliveries of a single food pellet (spaced apart by two  
635 minutes), confirmed electrode viability to detect dopamine. The session started with the illumination of  
636 the house light. The first 30 trials consisted of the presentation of a 5 s cue (1.5 kHz, 75 dB tone)  
637 followed by 6 s of WN (90 dB). Trials were separated by a variable inter-trial interval of 60s (range:  
638 30-90 s). For a subset of the rats (n = 11), these initial 30 trials were followed by 55 trials, in which 5s-  
639 cue/6s-WN pairings were randomly mixed with four trials with unpredicted WN (6s of 90-dB WN  
640 without cue), four trials with WN omission (5s-cue without WN), and four trials with 5s-cue followed by  
641 12s of 90-dB WN (longer-than-expected condition).

642 A subset of the initial 16 rats (n = 4) was conditioned for an additional 5 days (days 2-6), of which the  
643 first 4 days consisted of sessions with 30 trials of pairings of 5s-cue/6s with 90-dB WN, and on the  
644 fifth day (sixth day of conditioning in total) another FSCV recording session took place (as described  
645 for day 1). An additional group of animals (n=13), without implanted FSCV electrodes were  
646 conditioned for 6 days, in order to characterize behavioral responses to different WN intensities.

647 For the analysis of the first 30 conditioning trials, we compared the average dopamine concentration  
648 during the cue (5 s) and the WN (6 s) epoch to baseline (-5 to 0 s before cue onset). To analyze trials  
649 with different contingencies (unpredicted, omitted, or longer WN), we compared average dopamine  
650 during the relevant epochs (unpredicted WN: 11-25 s after cue onset; better than predicted (omitted  
651 WN): 5-20 s after cue onset; worse than predicted (longer WN): 11-25 s after cue onset) with average  
652 dopamine in the respective epochs in immediately preceding trials 5s-cue/6s-WN pairings (trials 25-  
653 30), during which dopamine decreases had stabilized and were unaffected by different contingencies.  
654 Slopes of dopamine traces were compared between trials with different contingencies and predicted  
655 WN trials since using the slope allows for integration of the change in dopamine concentration over  
656 time, as opposed to averaging concentrations over an epoch (in which there is no integration over  
657 time). All traces were aligned before WN onset.

658 To compare dopamine concentration during cue and WN between days 1 and 6 and to  
659 quantify the shift of dopamine release from the US to the CS, we subdivided the results of day 1 into  
660 “day 1 (early)” (trials 2-4; trial 1 was excluded to remove the saliency response to the first cue  
661 exposure) and “day 1 (late)” (trials 5-30). We calculated the ratio between US and CS dopamine  
662 signals as a deviation from baseline (in the respective up or down direction). For aversive  
663 conditioning, this ratio was determined by (area above the curve of the WN epoch)/(area above the  
664 curve of the cue epoch). For appetitive conditioning, this ratio was determined by (area under the  
665 curve of the pellet epoch)/(area under the curve of the cue epoch).

#### 666 *Appetitive Pavlovian conditioning*

667 Rats (n = 10) were placed in the operant box, and on days 1 and 6, they were tethered to the FSCV  
668 recording equipment. Illumination of the house light signaled the beginning of the session. Sessions

669 consisted of 40 pairings of cue-light illumination (5 s) with a pellet delivery (delivered immediately after  
670 cue offset), which were separated by variable inter-trial-intervals averaging 60 s (range: 30-90 s).

#### 671 *WN dose response*

672 Rats (n = 6) were tethered to the FSCV recording equipment and placed into the operant box. The  
673 two WN generators with custom-made volume control dials (NIN mechanical workshop) were used to  
674 switch between different WN intensities. The FSCV recording session consisted of 6 blocks in which  
675 two different WN intensities (70, 80, 90 or 96 dB) were presented for 6 s in random order, 4 times  
676 each, with a variable inter-trial-interval averaging 30 s (range: 25-35 s). Between blocks, the volume  
677 dial was used to change WN intensities. During the different blocks, all WN intensities were presented  
678 in pairs of two and, therefore, each intensity was presented in 3 of the 6 blocks and played 12 times in  
679 total. We compared the average dopamine concentration during the WN exposures between the  
680 different intensities.

681 An additional group of rats (n=13), without implanted FSCV electrodes, were placed into an operant  
682 box and underwent WN exposure in order to characterize behavioral responses to the four different  
683 WN intensities (70, 80, 90 or 96dB; randomly ordered in blocks of 15 trials) presented for a duration of  
684 6s per trial, followed by an average variable inter-trial interval of 60s (range: 30-90 s). Before the start  
685 of each block, 3 food pellets were delivered with a variable inter-trial interval averaging 30 s (range  
686 20-40). We compared the average baseline-subtracted locomotion speed of the animals during the  
687 WN exposures between the different intensities.

#### 688 *Aversive Pavlovian conditioning with 80-dB and 96-dB WN*

689 Rats (n = 9) underwent 4 aversive conditioning sessions in the operant box in which a 2 kHz and 8  
690 kHz tone (5 s cue) predicted the exposure to 80-dB or 96-dB WN (6 s), respectively. Sessions  
691 consisted of 88 trials, of which 40 trials with 80-dB WN and 40 trials with 96-dB WN, predicted by their  
692 respective cues, were presented in random order. In the remaining 8 trials, an unpredicted food pellet  
693 was delivered. These deliveries were distributed across the session so that in every block of 10 WN  
694 exposures, one pellet was delivered at a random trial number. Trials were separated by variable inter-  
695 trial-intervals averaging 60 s (range: 30-90 s). On the fourth conditioning day, a recording session  
696 took place, for which the rats were connected to the FSCV recording equipment. We compared  
697 average dopamine concentrations during the cue (5 s) and during the WN (6 s) epochs.

698 During the subsequent 4 aversive conditioning sessions, we changed the probability of exposure to  
699 80-dB and 96-dB WN following their associated cues. The total number of presentations of tone 1,  
700 tone 2, WN, and pellet deliveries remained the same. However, tone 1 was now followed by 80-dB  
701 WN (6 s) in 75% of the trials and by 96-dB WN (6 s) during the remaining 25% of the trials. Tone 2  
702 was followed by 96-dB WN (6 s) in 75% of the trials and 80-dB WN (6 s) during 25% of the trials. A  
703 recording session took place on the fourth conditioning day. We compared the average dopamine  
704 concentrations during the cue (5 s) and WN (6 s) epochs.

705 *Concurrent reward and WN, and cue extinction*

706 Rats (n = 6) were connected to the recording set up and placed in the operant box. The conditioning  
707 session began with 10 pairings of the 5-s cue (1.5 kHz tone) and 6 s WN (90dB). Next, followed a  
708 block of 20 trials pairing the 5-s cue and 24 s of WN; during half of these trials (randomized) a pellet  
709 was delivered 6 s into the WN exposure. The recording session was concluded with a block of 20  
710 extinction trials, in which only the 5s cue was delivered. This recording session was the last to take  
711 place, the rats had experienced 9-11 conditioning sessions prior to this recording.

712 **FSCV measurements and analysis**

713 As described previously (Willuhn *et al.*, 2014a), fast-scan cyclic voltammetry (FSCV) was used to  
714 detect subsecond changes in extracellular concentration of dopamine using chronically implanted  
715 carbon-fiber microsensors that were connected to a head-mounted voltammetric amplifier, interfaced  
716 with a PC-driven data-acquisition and analysis system (National Instruments) through an electrical  
717 commutator (Crist), which was mounted above the test chamber. Every 100 ms, voltammetric scans  
718 were repeated to achieve a sampling rate of 10 Hz. The electrical potential of the carbon-fiber  
719 electrode was linearly ramped from -0.4 V versus Ag/AgCl to +1.3 V (anodic sweep) and back  
720 (cathodic sweep) at 400V/s (8.5 ms total scan time) during each voltammetric scan, and held at -0.4 V  
721 between scans. Dopamine is oxidized during the anodic sweep, if present at the surface of the  
722 electrode, forming dopamine-o-quinone (peak reaction detected around +0.7 V), which is reduced  
723 back to dopamine in the cathodic sweep (peak reaction detected around -0.3 V). The ensuing flux of  
724 electrons is measured as current and is directly proportional to the number of molecules that undergo  
725 electrolysis. The background-subtracted, time-resolved current obtained from each scan provides a  
726 chemical signature characteristic of the analyte, allowing resolution of dopamine from other  
727 substances (Phillips & Wightman, 2003). Chemometric analysis with a standard training set was used  
728 to isolate dopamine from the voltammetric signal (Clark *et al.*, 2010). All data was smoothed with a  
729 moving 10-point median filter and baseline (set at 1 s before cue onset or in case of an absent cue 1s  
730 before WN onset) subtraction was performed on a trial-by-trial basis prior to analysis of average  
731 concentration. Analyses were performed on dopamine concentration during cue (5 s) and WN (6 s)  
732 epochs and were compared to baseline dopamine concentrations or to the same epoch in a different  
733 experimental condition. Prior to each FSCV recording session, two unexpected deliveries of a single  
734 food pellet (spaced apart by two minutes) confirmed electrode viability to detect dopamine. Animals  
735 were excluded from analysis when: 1) A lack of dopamine release in response to unexpected pellets  
736 before start of the behavioral session, 2) FSCV recording amplitude background noise that was larger  
737 than 1nA in amplitude.

738 **Analysis of operant-box behavior**

739 DeepLabCut software (Mathis *et al.*, 2018) was used to track rat movement in the operant box using  
740 video data recorded during FSCV measurements. This tracking data was analyzed in MATLAB (The  
741 Mathworks, Inc. Version 2019a) to determine distance to the reward magazine and speed of

742 movement (cm / s). Analyses were performed using the average distance or locomotion speed during  
743 the cue (5 s) or WN (6 s) epochs. During the WN- and reward-choice task, the number of presses on  
744 each lever was registered via an automated procedure.

745

#### 746 **Histological verification of recording sites**

747 After completion of the experiments, rats were deeply anesthetized using a lethal dose of  
748 pentobarbital. Recording sites were marked with an electrolytic lesion before transcardial perfusion  
749 with saline, followed by 4% paraformaldehyde (PFA). Brains were removed and post-fixed in PFA for  
750 24 hours after which they were placed in 30% sucrose for cryoprotection. The brains were rapidly  
751 frozen using an isopentane bath, sliced on a cryostat (50 µm coronal sections, -20°C), and stained  
752 with cresyl violet.

#### 753 **Statistical analysis**

754 FSCV and behavioral data were analyzed using one- or two-tailed paired or unpaired t-tests, repeated  
755 measures ANOVAs, regression analysis, or their nonparametric equivalents when appropriate. Post-  
756 hoc analyses were conducted when necessary and p-values were adjusted when multiple  
757 comparisons were made. Statistical analyses were performed using Prism (Graphpad software) and  
758 SPSS statistics version 25.0 (IBM); graphical representations were made using Prism. Statistical  
759 significance was set to  $p < 0.05$ . Sample size was not explicitly determined by a power analysis when  
760 the study was being designed, but was, instead, based on the lab's experience with this type of data.

#### 761 **ACKNOWLEDGEMENTS**

762 We thank Ralph Hamelink and Nicole Yee for their technical support, Matthijs Feenstra for his input  
763 on the manuscript, Lucia Economico for illustrations, and Linda Dekker for histology.

#### 764 **COMPETING INTERESTS**

765 The authors declare that no competing interests exist.

#### 766 **REFERENCES**

767 Anstrom, K.K., Miczek, K.A., & Budygin, E.A. (2009). Increased phasic dopamine signaling in the  
768 mesolimbic pathway during social defeat in rats. *Neuroscience*, 161(1), 3-12. DOI:

769 [10.1016/j.neuroscience.2009.03.023](https://doi.org/10.1016/j.neuroscience.2009.03.023)

770 Badrinarayan, A., Wescott, S.A., Vander Weele, C.M., Saunders, B.T., Couturier, B.E., Maren, S., &  
771 Aragona, B.J. (2012). Aversive stimuli differentially modulate real-time dopamine transmission  
772 dynamics within the nucleus accumbens core and shell. *Journal of Neuroscience*, 32(45), 15779-

773 15790. DOI: [10.1523/JNEUROSCI.3557-12.2012](https://doi.org/10.1523/JNEUROSCI.3557-12.2012)



- 774 Bassareo, V., De Luca, M.A., & Di Chiara, G. (2002). Differential expression of motivational stimulus  
775 properties by dopamine in nucleus accumbens shell versus core and prefrontal cortex. *Journal of*  
776 *neuroscience*, 22(11), 4709-4719. DOI: [10.1523/JNEUROSCI.22-11-04709.2002](https://doi.org/10.1523/JNEUROSCI.22-11-04709.2002)
- 777 Berridge, K.C., & Robinson, T.E. (1998). What is the role of dopamine in reward: hedonic impact,  
778 reward learning, or incentive salience?. *Brain research reviews*, 28(3), 309-369. DOI: [10.1016/s0165-](https://doi.org/10.1016/s0165-0173(98)00019-8)  
779 [0173\(98\)00019-8](https://doi.org/10.1016/s0165-0173(98)00019-8)
- 780 Boureau, Y.L., & Dayan, P. (2011). Opponency revisited: competition and cooperation between  
781 dopamine and serotonin. *Neuropsychopharmacology*, 36(1), 74-97. DOI: [10.1038/npp.2010.151](https://doi.org/10.1038/npp.2010.151)
- 782 Brischoux, F., Chakraborty, S., Brierley, D.I., & Ungless, M.A. (2009). Phasic excitation of dopamine  
783 neurons in ventral VTA by noxious stimuli. *Proceedings of the national academy of sciences*, 106(12),  
784 4894-4899. DOI: [10.1073/pnas.0811507106](https://doi.org/10.1073/pnas.0811507106)
- 785 Bromberg-Martin, E.S., & Hikosaka, O. (2009). Midbrain dopamine neurons signal preference for  
786 advance information about upcoming rewards. *Neuron*, 63(1), 119-126. DOI:  
787 [10.1016/j.neuron.2009.06.009](https://doi.org/10.1016/j.neuron.2009.06.009)
- 788 Bromberg-Martin, E.S., Matsumoto, M., & Hikosaka, O. (2010). Dopamine in motivational control:  
789 rewarding, aversive, and alerting. *Neuron*, 68(5), 815-834. DOI: [10.1016/j.neuron.2010.11.022](https://doi.org/10.1016/j.neuron.2010.11.022)
- 790 Budygin, E.A., Park, J., Bass, C.E., Grinevich, V.P., Bonin, K.D., & Wightman, R.M. (2012). Aversive  
791 stimulus differentially triggers subsecond dopamine release in reward regions. *Neuroscience*, 201,  
792 331-337. DOI: [10.1016/j.neuroscience.2011.10.056](https://doi.org/10.1016/j.neuroscience.2011.10.056)
- 793 Campbell, B.A., & Bloom, J.M. (1965). Relative aversiveness of noise and shock. *Journal of*  
794 *Comparative and Physiological Psychology*, 60(3), 440. DOI: [10.1037/h0022572](https://doi.org/10.1037/h0022572)
- 795 Caplin, A., & Dean, M. (2007). The neuroeconomic theory of learning. *American Economic Review*,  
796 97(2), 148-152. DOI: [10.1257/aer.97.2.148](https://doi.org/10.1257/aer.97.2.148)
- 797 Clark, J.J., Sandberg, S.G., Wanat, M.J., Gan, J.O., Horne, E.A., Hart, A.S., Akers, C.A., Parker, J.G.,  
798 Willuhn, I., Martinez, V., Evans, S.B., Stella, N. & Phillips, P.E. (2010). Chronic microsensors for  
799 longitudinal, subsecond dopamine detection in behaving animals. *Nature methods*, 7(2), 126-129.  
800 DOI: [10.1038/nmeth.1412](https://doi.org/10.1038/nmeth.1412)
- 801 Coddington, L.T., & Dudman, J.T. (2019). Learning from action: Reconsidering movement signaling in  
802 midbrain dopamine neuron activity. *Neuron*, 104(1), 63-77. DOI: [10.1016/j.neuron.2019.08.036](https://doi.org/10.1016/j.neuron.2019.08.036)
- 803 Cohen, J.Y., Haesler, S., Vong, L., Lowell, B.B., & Uchida, N. (2012). Neuron-type-specific signals for  
804 reward and punishment in the ventral tegmental area. *Nature*, 482(7383), 85-88. DOI:  
805 [10.1038/nature10754](https://doi.org/10.1038/nature10754)

- 806 Coizet, V., Dommett, E.J., Redgrave, P., & Overton, P.G. (2006). Nociceptive responses of midbrain  
807 dopaminergic neurones are modulated by the superior colliculus in the rat. *Neuroscience*, 139(4),  
808 1479-1493. DOI: [10.1016/j.neuroscience.2006.01.030](https://doi.org/10.1016/j.neuroscience.2006.01.030)
- 809 Fiorillo, C.D. (2013). Two dimensions of value: dopamine neurons represent reward but not  
810 aversiveness. *Science*, 341(6145), 546-549. DOI: [10.1126/science.1238699](https://doi.org/10.1126/science.1238699)
- 811 Flagel, S.B., Clark, J.J., Robinson, T.E., Mayo, L., Czuj, A., Willuhn, I., Akers, C.A., Clinton, S.M.,  
812 Phillips, P.E. & Akil, H. (2011). A selective role for dopamine in stimulus–reward learning. *Nature*,  
813 469(7328), 53-57. DOI: [10.1038/nature09588](https://doi.org/10.1038/nature09588)
- 814 Gan, J.O., Walton, M.E., & Phillips, P.E. (2010). Dissociable cost and benefit encoding of future  
815 rewards by mesolimbic dopamine. *Nature neuroscience*, 13(1), 25-27. DOI: [10.1038/nn.2460](https://doi.org/10.1038/nn.2460)
- 816 Guarraci, F.A., & Kapp, B.S. (1999). An electrophysiological characterization of ventral tegmental area  
817 dopaminergic neurons during differential pavlovian fear conditioning in the awake rabbit. *Behavioural*  
818 *brain research*, 99(2), 169-179. DOI: [10.1016/s0166-4328\(98\)00102-8](https://doi.org/10.1016/s0166-4328(98)00102-8)
- 819 Hart, A.S., Rutledge, R.B., Glimcher, P.W., & Phillips, P.E. (2014). Phasic dopamine release in the rat  
820 nucleus accumbens symmetrically encodes a reward prediction error term. *Journal of Neuroscience*,  
821 34(3), 698-704. DOI: [10.1523/JNEUROSCI.2489-13.2014](https://doi.org/10.1523/JNEUROSCI.2489-13.2014)
- 822 Hughes, R.A., & Bardo, M.T. (1981). Shuttlebox avoidance by rats using white noise intensities from  
823 90-120 db SPL as the UCS. *The Journal of Auditory Research*, 21(2), 109-118.
- 824 Ikemoto, S. (2007). Dopamine reward circuitry: two projection systems from the ventral midbrain to  
825 the nucleus accumbens–olfactory tubercle complex. *Brain research reviews*, 56(1), 27-78. DOI:  
826 [10.1016/j.brainresrev.2007.05.004](https://doi.org/10.1016/j.brainresrev.2007.05.004)
- 827 de Jong, J.W., Afjei, S.A., Dorocic, I.P., Peck, J.R., Liu, C., Kim, C.K., Tian, L., Deisseroth, K. &  
828 Lammel, S. (2019). A neural circuit mechanism for encoding aversive stimuli in the mesolimbic  
829 dopamine system. *Neuron*, 101(1), 133-151. DOI: [10.1016/j.neuron.2018.11.005](https://doi.org/10.1016/j.neuron.2018.11.005)
- 830 Klanker, M., Fellingner, L., Feenstra, M., Willuhn, I., & Denys, D. (2017). Regionally distinct phasic  
831 dopamine release patterns in the striatum during reversal learning. *Neuroscience*, 345, 110-123. DOI:  
832 [10.1016/j.neuroscience.2016.05.011](https://doi.org/10.1016/j.neuroscience.2016.05.011)
- 833 Lammel, S., Ion, D.I., Roeper, J., & Malenka, R. C. (2011). Projection-specific modulation of  
834 dopamine neuron synapses by aversive and rewarding stimuli. *Neuron*, 70(5), 855-862. DOI:  
835 [10.1016/j.neuron.2011.03.025](https://doi.org/10.1016/j.neuron.2011.03.025)
- 836 Liu, Z. H., Shin, R., & Ikemoto, S. (2008). Dual role of medial A10 dopamine neurons in affective  
837 encoding. *Neuropsychopharmacology*, 33(12), 3010-3020. DOI: [10.1038/npp.2008.4](https://doi.org/10.1038/npp.2008.4)

- 838 Lopes, G., Bonacchi, N., Frazão, J., Neto, J.P., Atallah, B.V., Soares, S., Moreira, L., Matias, S.,  
839 Itskov, P.M., Correia, P.A., Medina, R.E., Calcaterra, L., Dreosti, E., Paton, J.J., Kampff, A.R. (2015).  
840 Bonsai: an event-based framework for processing and controlling data streams. *Frontiers in*  
841 *neuroinformatics*, 9, 7. DOI: [10.3389/fninf.2015.00007](https://doi.org/10.3389/fninf.2015.00007)
- 842 Mark, G.P., Blander, D.S., & Hoebel, B.G. (1991). A conditioned stimulus decreases extracellular  
843 dopamine in the nucleus accumbens after the development of a learned taste aversion. *Brain*  
844 *research*, 551(1-2), 308-310. DOI: [10.1016/0006-8993\(91\)90946-s](https://doi.org/10.1016/0006-8993(91)90946-s)
- 845 Martinez, R.C.R., Oliveira, A.R., Macedo, C.E., Molina, V.A., & Brandão, M.L. (2008). Involvement of  
846 dopaminergic mechanisms in the nucleus accumbens core and shell subregions in the expression of  
847 fear conditioning. *Neuroscience letters*, 446(2-3), 112-116. DOI: [10.1016/j.neulet.2008.09.057](https://doi.org/10.1016/j.neulet.2008.09.057)
- 848 Matsumoto, M., & Hikosaka, O. (2009). Two types of dopamine neuron distinctly convey positive and  
849 negative motivational signals. *Nature*, 459(7248), 837-841 DOI: [10.1038/nature08028](https://doi.org/10.1038/nature08028)
- 850 Matsumoto, H., Tian, J., Uchida, N., & Watabe-Uchida, M. (2016). Midbrain dopamine neurons signal  
851 aversion in a reward-context-dependent manner. *Elife*, 5, e17328. DOI: [10.7554/eLife.17328](https://doi.org/10.7554/eLife.17328)
- 852 McCutcheon, J.E., Ebner, S.R., Loriaux, A.L., & Roitman, M.F. (2012). Encoding of aversion by  
853 dopamine and the nucleus accumbens. *Frontiers in neuroscience*, 6, 137. DOI:  
854 [10.3389/fnins.2012.00137](https://doi.org/10.3389/fnins.2012.00137)
- 855 Menegas, W., Babayan, B.M., Uchida, N., & Watabe-Uchida, M. (2017). Opposite initialization to  
856 novel cues in dopamine signaling in ventral and posterior striatum in mice. *Elife*, 6, e21886. DOI:  
857 [10.7554/eLife.21886](https://doi.org/10.7554/eLife.21886)
- 858 Menegas, W., Akiti, K., Amo, R., Uchida, N., & Watabe-Uchida, M. (2018). Dopamine neurons  
859 projecting to the posterior striatum reinforce avoidance of threatening stimuli. *Nature neuroscience*,  
860 21(10), 1421-1430. DOI: [10.1038/s41593-018-0222-1](https://doi.org/10.1038/s41593-018-0222-1)
- 861 Mikhailova, M.A., Deal, A.L., Grinevich, V.P., Bonin, K.D., Gainetdinov, R.R., & Budygin, E.A. (2018).  
862 Real-Time Accumbal Dopamine Response to Negative Stimuli: Effects of Ethanol. *ACS chemical*  
863 *neuroscience*, 10(4), 1986-1991. DOI: [10.1021/acscchemneuro.8b00272](https://doi.org/10.1021/acscchemneuro.8b00272)
- 864 Mileykovskiy, B., & Morales, M. (2011). Duration of inhibition of ventral tegmental area dopamine  
865 neurons encodes a level of conditioned fear. *Journal of Neuroscience*, 31(20), 7471-7476. DOI:  
866 [10.1523/JNEUROSCI.5731-10.2011](https://doi.org/10.1523/JNEUROSCI.5731-10.2011)
- 867 Mirenowicz, J., & Schultz, W. (1996). Preferential activation of midbrain dopamine neurons by  
868 appetitive rather than aversive stimuli. *Nature*, 379(6564), 449-451. DOI: [10.1038/379449a0](https://doi.org/10.1038/379449a0)

- 869 Mohebi, A., Pettibone, J.R., Hamid, A.A., Wong, J.M.T., Vinson, L.T., Patriarchi, T., Tian, L., Kennedy  
870 R.T. & Berke, J.D. (2019). Dissociable dopamine dynamics for learning and motivation. *Nature*,  
871 *570*(7759), 65-70. DOI: [10.1038/s41586-019-1235-y](https://doi.org/10.1038/s41586-019-1235-y)
- 872 Oleson, E.B., Gentry, R.N., Chioma, V.C., & Cheer, J.F. (2012). Subsecond dopamine release in the  
873 nucleus accumbens predicts conditioned punishment and its successful avoidance. *Journal of*  
874 *Neuroscience*, *32*(42), 14804-14808. DOI: [10.1523/JNEUROSCI.3087-12.2012](https://doi.org/10.1523/JNEUROSCI.3087-12.2012)
- 875 Papageorgiou, G.K., Baudonnat, M., Cucca, F., & Walton, M.E. (2016). Mesolimbic dopamine  
876 encodes prediction errors in a state-dependent manner. *Cell reports*, *15*(2), 221-228. DOI:  
877 [10.1016/j.celrep.2016.03.031](https://doi.org/10.1016/j.celrep.2016.03.031)
- 878 Pascucci, T., Ventura, R., Latagliata, E.C., Cabib, S., & Puglisi-Allegra, S. (2007). The medial  
879 prefrontal cortex determines the accumbens dopamine response to stress through the opposing  
880 influences of norepinephrine and dopamine. *Cerebral cortex*, *17*(12), 2796-2804. DOI:  
881 [10.1093/cercor/bhm008](https://doi.org/10.1093/cercor/bhm008)
- 882 Paxinos, G., & Watson, C. (2007). *The rat brain in stereotaxic coordinates*. Elsevier.
- 883 Phillips, P.E., & Wightman, R.M. (2003). Critical guidelines for validation of the selectivity of in-vivo  
884 chemical microsensors. *TrAC Trends in Analytical Chemistry*, *22*(8), 509-514.
- 885 Rice, M.E., & Cragg, S.J. (2008). Dopamine spillover after quantal release: rethinking dopamine  
886 transmission in the nigrostriatal pathway. *Brain research reviews*, *58*(2), 303-313. DOI:  
887 [10.1016/j.brainresrev.2008.02.004](https://doi.org/10.1016/j.brainresrev.2008.02.004)
- 888 Roitman, M.F., Wheeler, R.A., Wightman, R.M., & Carelli, R.M. (2008). Real-time chemical responses  
889 in the nucleus accumbens differentiate rewarding and aversive stimuli. *Nature neuroscience*, *11*(12),  
890 1376-1377. DOI: [10.1038/nn.2219](https://doi.org/10.1038/nn.2219)
- 891 Salinas-Hernández, X. I., Vogel, P., Betz, S., Kalisch, R., Sigurdsson, T., & Duvarci, S. (2018).  
892 Dopamine neurons drive fear extinction learning by signaling the omission of expected aversive  
893 outcomes. *Elife*, *7*, e38818. DOI: [10.7554/eLife.38818](https://doi.org/10.7554/eLife.38818)
- 894 Schultz, W., & Romo, R. (1987). Responses of nigrostriatal dopamine neurons to high-intensity  
895 somatosensory stimulation in the anesthetized monkey. *Journal of neurophysiology*, *57*(1), 201-217.  
896 DOI: [10.1152/jn.1987.57.1.201](https://doi.org/10.1152/jn.1987.57.1.201)
- 897 Schultz, W., Dayan, P., & Montague, P.R. (1997). A neural substrate of prediction and reward.  
898 *Science*, *275*(5306), 1593-1599. DOI: [10.1126/science.275.5306.1593](https://doi.org/10.1126/science.275.5306.1593)
- 899 Schultz, W. (2019). Recent advances in understanding the role of phasic dopamine activity.  
900 *F1000Research*, *8*. DOI: [10.12688/f1000research.19793.1](https://doi.org/10.12688/f1000research.19793.1)

- 901 da Silva, J.A., Tecuapetla, F., Paixão, V., & Costa, R.M. (2018). Dopamine neuron activity before  
902 action initiation gates and invigorates future movements. *Nature*, 554(7691), 244-248. DOI:  
903 [10.1038/nature25457](https://doi.org/10.1038/nature25457)
- 904 Stelly, C.E., Haug, G.C., Fonzi, K.M., Garcia, M.A., Tritley, S.C., Magnon, A.P., Ramos, M.A. &  
905 Wanat, M.J. (2019). Pattern of dopamine signaling during aversive events predicts active avoidance  
906 learning. *Proceedings of the National Academy of Sciences*, 116(27), 13641-13650. DOI:  
907 [10.1073/pnas.1904249116](https://doi.org/10.1073/pnas.1904249116)
- 908 Syed, E.C., Grima, L.L., Magill, P.J., Bogacz, R., Brown, P., & Walton, M.E. (2016). Action initiation  
909 shapes mesolimbic dopamine encoding of future rewards. *Nature neuroscience*, 19(1), 34-36. DOI:  
910 [10.1038/nn.4187](https://doi.org/10.1038/nn.4187)
- 911 Threlfell, S., Lalic, T., Platt, N.J., Jennings, K.A., Deisseroth, K., & Cragg, S.J. (2012). Striatal  
912 dopamine release is triggered by synchronized activity in cholinergic interneurons. *Neuron*, 75(1), 58-  
913 64. DOI: [10.1016/j.neuron.2012.04.038](https://doi.org/10.1016/j.neuron.2012.04.038)
- 914 Tobler, P.N., Fiorillo, C.D., & Schultz, W. (2005). Adaptive coding of reward value by dopamine  
915 neurons. *Science*, 307(5715), 1642-1645. DOI: [10.1126/science.1105370](https://doi.org/10.1126/science.1105370)
- 916 Twining, R.C., Wheeler, D.S., Ebben, A.L., Jacobsen, A.J., Robble, M.A., Mantsch, J.R., & Wheeler,  
917 R.A. (2015). Aversive stimuli drive drug seeking in a state of low dopamine tone. *Biological psychiatry*,  
918 77(10), 895-902. DOI: [10.1016/j.biopsych.2014.09.004](https://doi.org/10.1016/j.biopsych.2014.09.004)
- 919 Ungless, M.A., Magill, P.J., & Bolam, J.P. (2004). Uniform inhibition of dopamine neurons in the  
920 ventral tegmental area by aversive stimuli. *Science*, 303(5666), 2040-2042. DOI:  
921 [10.1126/science.1093360](https://doi.org/10.1126/science.1093360)
- 922 Valenti, O., Lodge, D.J., & Grace, A.A. (2011). Aversive stimuli alter ventral tegmental area dopamine  
923 neuron activity via a common action in the ventral hippocampus. *Journal of Neuroscience*, 31(11),  
924 4280-4289. DOI: [10.1523/JNEUROSCI.5310-10.2011](https://doi.org/10.1523/JNEUROSCI.5310-10.2011)
- 925 Ventura, R., Morrone, C., & Puglisi-Allegra, S. (2007). Prefrontal/accumbal catecholamine system  
926 determines motivational salience attribution to both reward-and aversion-related stimuli. *Proceedings*  
927 *of the National Academy of Sciences*, 104(12), 5181-5186. DOI: [10.1073/pnas.0610178104](https://doi.org/10.1073/pnas.0610178104)
- 928 Watabe-Uchida, M., Eshel, N., & Uchida, N. (2017). Neural circuitry of reward prediction error. *Annual*  
929 *review of neuroscience*, 40, 373-394. DOI: [10.1146/annurev-neuro-072116-031109](https://doi.org/10.1146/annurev-neuro-072116-031109)
- 930 Wheeler, R.A., Aragona, B.J., Fuhrmann, K.A., Jones, J.L., Day, J.J., Cacciapaglia, F., Wightman,  
931 R.M. & Carelli, R. M. (2011). Cocaine cues drive opposing context-dependent shifts in reward  
932 processing and emotional state. *Biological psychiatry*, 69(11), 1067-1074. DOI:  
933 [10.1016/j.biopsych.2011.02.014](https://doi.org/10.1016/j.biopsych.2011.02.014)



- 934 Wilkinson, L.S., Humby, T., Killcross, A.S., Torres, E.M., Everitt, B.J., & Robbins, T.W. (1998).  
935 Dissociations in dopamine release in medial prefrontal cortex and ventral striatum during the  
936 acquisition and extinction of classical aversive conditioning in the rat. *European Journal of*  
937 *Neuroscience*, 10(3), 1019-1026. DOI: [10.1046/j.1460-9568.1998.00119.x](https://doi.org/10.1046/j.1460-9568.1998.00119.x)
- 938 Willuhn, I., Burgeno, L.M., Everitt, B.J., & Phillips, P.E. (2012). Hierarchical recruitment of phasic  
939 dopamine signaling in the striatum during the progression of cocaine use. *Proceedings of the National*  
940 *Academy of Sciences*, 109(50), 20703-20708. DOI: [10.1073/pnas.1213460109](https://doi.org/10.1073/pnas.1213460109)
- 941 Willuhn, I., Burgeno, L.M., Groblewski, P.A., & Phillips, P.E. (2014a). Excessive cocaine use results  
942 from decreased phasic dopamine signaling in the striatum. *Nature neuroscience*, 17(5), 704-709. DOI:  
943 [10.1038/nn.3694](https://doi.org/10.1038/nn.3694)
- 944 Willuhn, I., Tose, A., Wanat, M. J., Hart, A. S., Hollon, N. G., Phillips, P. E., Schwarting, R.K.W. &  
945 Wöhr, M. (2014b). Phasic dopamine release in the nucleus accumbens in response to pro-social 50  
946 kHz ultrasonic vocalizations in rats. *Journal of Neuroscience*, 34(32), 10616-10623. DOI:  
947 [10.1523/JNEUROSCI.1060-14.2014](https://doi.org/10.1523/JNEUROSCI.1060-14.2014)
- 948 Young, A M.J., Joseph, M.H., & Gray, J.A. (1993). Latent inhibition of conditioned dopamine release  
949 in rat nucleus accumbens. *Neuroscience*, 54(1), 5-9. DOI: [10.1016/0306-4522\(93\)90378-s](https://doi.org/10.1016/0306-4522(93)90378-s)
- 950 Young, A.M. (2004). Increased extracellular dopamine in nucleus accumbens in response to  
951 unconditioned and conditioned aversive stimuli: studies using 1 min microdialysis in rats. *Journal of*  
952 *neuroscience methods*, 138(1-2), 57-63. DOI: [10.1016/j.jneumeth.2004.03.003](https://doi.org/10.1016/j.jneumeth.2004.03.003)
- 953 Zweifel, L. S., Fadok, J. P., Argilli, E., Garelick, M. G., Jones, G. L., Dickerson, T. M., Allen, J.M.,  
954 Mizumori, S.J., Bonci, A. & Palmiter, R. D. (2011). Activation of dopamine neurons is critical for  
955 aversive conditioning and prevention of generalized anxiety. *Nature neuroscience*, 14(5), 620-626.  
956 DOI: [10.1038/nn.2808](https://doi.org/10.1038/nn.2808)
- 957

958 Supplementary Table 1

| <b>Experiment</b>                                         | <b>N</b> | <b>FSCV readout</b> | <b>Behavioral readout</b> |
|-----------------------------------------------------------|----------|---------------------|---------------------------|
| Real time place preference (Fig 1A)                       | 10       |                     | X                         |
| WN and reward choice task (Fig 1B)                        | 6        |                     | X                         |
| Aversive Pavlovian conditioning day 1                     |          |                     |                           |
| - First 30 trials (Fig 2A, B and C)                       | 16       | X                   | X                         |
| - Mix trials (Fig 3D, E and F)                            | 11       | X                   |                           |
| Appetitive Pavlovian conditioning (Fig 2B and C)          | 10       | X                   | X                         |
| Aversive Pavlovian conditioning days 2 – 6 (Fig 2B and C) | 4        | X                   | X                         |
|                                                           | 13       |                     | X                         |
| Dose response (Fig 2E and F)                              | 6        | X                   | X                         |
|                                                           | 13       |                     | X                         |
| Deterministic experiment (Fig 2G)                         | 9        | X                   |                           |
| Probabilistic experiment (Fig 3A, B and C)                | 9        | X                   |                           |
| Concurrent reward & WN and extinction (Fig 2D, 3G and H)  | 6        | X                   |                           |
